# Supplementary material
Source: publisher figshare collection journal article supplement (https://gsapubs.figshare.com/articles/dataset/_/23604195)
Supplement: Supplementary file 1 [file 2]

## Sheet: Proxies
Supplementary Dataset1. Data corresponding to figures 4 and 8.									D
Age (Ma)	Sediment accumulation rate (m m.y.-1)	Log10 (Median size)	CIA (%)	CIW (%)	PIA (%)	CIA (%) (After removing the grain-size effect)	Age (Ma)	Black carbon DAR (mg-1·cm2·kyr-1)
4.5811	120.238	1.12963	65.7728	78.9487	73.6752	-3.01489	4.87983	10.1196
4.58193	120.238	0.949244	62.5893	74.2572	68.3586	-8.32774	4.92734	4.92139
4.58276	120.238	0.994141	67.7825	82.0208	77.2398	-2.59845	5.004	234.457
4.58359	120.238	1.61349	57.2874	68.0266	60.65	-6.09913	5.039	214.429
4.58443	120.238	1.70668	58.9953	69.9209	63.0843	-3.40087	5.0705	200.697
4.58526	120.238	1.38227	62.8518	75.0471	69.0398	-3.06072	5.102	96.1714
4.58609	120.238	2.39646	52.7479	65.7329	54.5426	-2.78243	5.144	232.229
4.58692	120.238		53.3032	66.3031	55.4342		5.179	1.32857
4.58775	120.238	2.40573	53.1858	66.18	55.2458	-2.25771	5.214	151.629
4.58858	120.238	2.33424	53.4929	65.691	55.5564	-2.62452	5.27651	44.4385
4.58942	120.238	2.54668	54.383	67.0735	57.0512	0.244651	5.3803	64.1237
4.59025	120.238	2.32138	57.2772	71.2181	61.9592	1.03766	5.44672	18.8854
4.59108	120.238	2.32316	52.1795	64.7185	53.5584	-4.04305	5.57749	71.7598
4.59191	120.238	2.38427	55.2152	67.0773	58.0692	-0.429707	5.68127	60.496
4.59274	120.238	0.904337	71.9317	88.6051	85.1669	0.474487	5.78505	97.4189
4.59357	120.238	0.983401	72.1196	88.5142	85.135	1.6108	5.88884	157.24
4.59441	120.238	1.29675	71.5659	87.3176	83.7384	4.69383	6.003	86.9645
4.59524	120.238	1.03306	72.0055	87.9637	84.5367	2.08602	6.086	74.4759
4.59607	120.238	1.19929	65.4792	78.3969	73.0876	-2.50347	6.169	71.0542
4.5969	120.238	1.29579	65.9335	79.1636	73.933	-0.949504	6.252	79.241
4.59773	120.238	1.07162	72.0742	88.6266	85.2359	2.60886
4.59856	120.238	1.08782	66.6253	80.0502	75.0159	-2.65023
4.5994	120.238	1.31815	66.2718	79.0936	74.0785	-0.358928
4.60023	120.238	0.916875	68.5338	82.3188	77.8669	-2.77217
4.60106	120.238	0.930643	28.9802	30.3635	26.873
4.60189	120.238	1.09934	26.3246	27.34	24.4247
4.60272	120.238	1.15439	18.4071	18.721	17.3108
4.60355	120.238	0.979002	33.6314	35.8404	31.33
4.60439	120.238	1.17035	63.4497	75.3032	69.6294	-4.86629
4.60522	120.238	1.3309	37.296	40.4112	34.9803
4.60605	120.238	1.28502	59.7451	69.7276	63.6549	-7.25974
4.60688	120.238	1.06528	33.2361	35.5942	30.6756
4.60771	120.238	1.04603	23.9629	24.7735	22.1397
4.60854	120.238	1.03149	46.6037	52.1962	45.6775
4.60938	120.238	0.809829	68.1666	82.1756	77.5649	-4.44112
4.61021	120.238	1.03567	70.3125	84.6823	80.7477	0.423841
4.61104	120.238	1.00178	71.6016	87.3163	83.7497	1.31142
4.61187	120.238	0.997037	69.1867	82.4551	78.2921	-1.15978
4.6127	120.238	1.25467	66.4831	78.9298	74.0765	-0.866247
4.61353	120.238	1.34551	66.4786	78.9758	74.1085	0.155295
4.61437	120.238	1.34042	59.7315	68.8444	63.2354	-6.64886
4.6152	120.238	1.13884	62.5822	72.7957	67.4901	-6.09847
4.61603	120.238	0.886885	69.7072	84.403	80.2364	-1.96106
4.61686	120.238		68.8188	81.7358	77.5156	-14.4382
4.61769	120.238		72.82	88.055	84.8947	-10.437
4.61852	120.238	0.887505	72.3964	87.2527	83.9614	0.735574
4.61936	120.238	0.936363	71.5966	86.4693	82.9216	0.525027
4.62019	120.238	1.06666	69.8567	84.4634	80.3559	0.333079
4.62102	120.238		69.045	82.9255	78.6292	-14.212
4.62185	120.238	1.30203	69.8506	83.9006	79.847	3.03816
4.62268	120.238	1.28623	73.2944	90.9386	88.0656	6.30331
4.62351	120.238	0.95458	71.4419	87.9119	84.2902	0.588875
4.62435	120.238	0.948511	71.5502	87.505	83.9191	0.624383
4.62518	120.238	0.947336	64.1665	76.4698	70.8878	-6.77331
4.62601	120.238	1.06963	61.7415	72.297	66.5842	-7.74718
4.62684	120.238	1.44059	65.9449	78.7853	73.6557	0.678877
4.62767	120.238	1.12408	66.6198	79.8369	74.8465	-2.23245
4.6285	120.238	1.49428	65.079	78.4457	72.8743	0.402412
4.62934	120.238	1.09868	68.5825	82.4903	78.0363	-0.565909
4.63017	120.238	0.990161	69.1093	82.9905	78.7153	-1.31899
4.631	120.238	0.879325	70.2988	85.036	81.0669	-1.46115
4.63183	120.238	1.19033	59.8595	69.9145	63.8406	-8.22609
4.63266	120.238	0.822626	61.261	71.4672	65.7633	-11.1898
4.6335	120.238	1.17545	65.8744	77.8784	72.949	-2.38265
4.63433	120.238	1.00677	67.1577	80.111	75.3581	-3.07327
4.63516	120.238	1.03044	68.3583	81.7301	77.2872	-1.59219
4.63599	120.238	0.837399	68.8077	82.5033	78.1553	-3.46247
4.63682	120.238	1.09726	63.5289	74.5623	69.2159	-5.63615
4.63765	120.238	0.930694	61.2425	71.133	65.5732	-9.89711
4.63849	120.238	0.956361	67.5496	81.344	76.5566	-3.28213
4.63932	120.238	1.21376	68.4499	82.4313	77.9216	0.633326
4.64015	120.238	0.967642	68.8535	82.679	78.3272	-1.84332
4.64098	120.238	0.75297	70.6896	85.6778	81.8239	-2.61922
4.64181	120.238	1.22272	71.1592	86.5019	82.7915	3.44514
4.64264	120.238	0.807129	72.4945	89.2296	85.9971	-0.146381
4.64348	120.238	0.77612	72.7811	89.7706	86.6556	-0.24142
4.64431	120.238	0.979912	68.8822	83.7179	79.2485	-1.66813
4.64514	120.238	0.926342	66.4697	79.541	74.5329	-4.72233
4.64597	120.238	0.873902	68.1521	82.6564	77.9674	-3.67364
4.6468	120.238	0.995416	67.5054	81.1215	76.3515	-2.86042
4.64763	120.238	0.869525	70.9828	86.2097	82.4435	-0.896106
4.64847	120.238	0.868527	58.1378	67.52	61.2698	-13.7532
4.6493	120.238	0.950511	27.2848	28.6254	24.9372
4.65013	120.238	0.944236	17.2775	17.5234	16.3327
4.65096	120.238	1.03882	15.4479	15.6188	14.6752
4.65179	120.238	1.07133	17.5174	17.7858	16.5064
4.65262	120.238	0.939918	14.6189	14.774	13.8602
4.65346	120.238	0.897022
4.65429	120.238	0.870755	20.7201	21.2355	19.2262
4.65512	120.238	1.17199	15.6358	15.8385	14.733
4.65595	120.238	1.22727	61.5144	71.6566	66.0609	-6.14755
4.65678	120.238	1.0329	63.9186	75.7442	70.2379	-6.0028
4.65761	120.238	1.16331	68.2152	82.1131	77.5365	-0.182011
4.65845	120.238	1.10887	67.7463	81.3461	76.6609	-1.28314
4.65928	120.238	1.29789	66.5936	79.7305	74.7493	-0.265557
4.66011	120.238	1.33409	62.8943	74.2295	68.5639	-3.55713
4.66094	120.238	1.33319	62.1076	74.3649	68.0617	-4.35394
4.66177	120.238	1.3631	62.0667	73.7909	67.6871	-4.05964
4.6626	120.238	1.49058	60.4682	71.8874	65.3424	-4.24889
4.66344	120.238	1.42343	59.8624	70.7988	64.2714	-5.59332
4.66427	120.238	1.44858	62.0964	73.1885	67.3577	-3.08159
4.6651	120.238	1.10697	40.7721	44.7019	38.8034
4.66593	120.238	1.1337	35.9232	38.8401	33.4351
4.66676	120.238	1.37865	48.658	55.0997	48.2484
4.66759	120.238	1.33169	43.0438	47.6263	41.3863
4.66843	120.238	1.23897	51.5235	58.6064	52.0091	-16.0047
4.66926	120.238	1.51304	51.0797	58.1177	51.4248	-13.3921
4.67009	120.238	1.96942	55.9662	67.3827	59.024	-3.71999
4.67092	120.238	2.14684	55.3866	67.7683	58.4883	-2.5365
4.67175	120.238	2.24176	53.5722	65.6293	55.6471	-3.42917
4.67258	120.238	2.28094	54.2806	66.9724	56.8932	-2.34461
4.67342	120.238	2.24703	55.1056	68.1708	58.2791	-1.84496
4.67425	120.238	2.22096	53.4528	65.8293	55.5334	-3.74931
4.67508	120.238	2.30863	54.0306	67.1911	56.6264	-2.33017
4.67591	120.238	2.51773	52.8106	66.778	54.832	-1.59325
4.67674	120.238	2.53218	52.0514	65.4054	53.4673	-2.21975
4.67757	120.238	1.21922	62.6981	75.8964	69.4696	-5.05597
4.67841	120.238	1.232	60.7946	71.1461	65.225	-6.81319
4.67924	120.238	1.15761	63.0612	74.1845	68.6557	-5.40202
4.68007	120.238	1.34764	65.1261	76.937	71.8279	-1.17326
4.6809	120.238	1.13624	58.3148	67.1833	61.2975	-10.396
4.68173	120.238	1.2132	48.8574	54.5224	48.5577
4.68256	120.238	1.00017	35.9915	38.6914	33.7194
4.6834	120.238	1.27231	68.3189	82.3909	77.823	1.16996
4.68423	120.238	1.118	28.4643	29.7956	26.3509
4.68506	120.238	1.10237	67.7884	81.366	76.699	-1.31697
4.68589	120.238	1.18721	22.9446	23.6165	21.3123
4.68672	120.238	0.792952	73.0577	89.3501	86.2935	0.242627
4.68755	120.238	1.10799	72.413	88.0407	84.7494	3.37329
4.68839	120.238	1.2754	66.4784	79.2787	74.3374	-0.63537
4.68922	120.238	1.09219	70.4249	84.82	80.9199	1.20062
4.69005	120.238	1.25527	70.5735	86.0403	82.1223	3.23103
4.69088	120.238	0.867644	63.1299	74.1706	68.6958	-8.77184
4.69171	120.238	0.686189	72.5072	88.2922	85.0341	-1.63359
4.69254	120.238	0.784974	73.6829	90.4196	87.6038	0.769508
4.69338	120.238	0.826981	67.4619	80.0518	75.4749	-4.93564
4.69421	120.238	0.860937	71.4435	86.1519	82.5618	-0.539763
4.69504	120.238	0.885813	72.5682	88.7911	85.5639	0.886874
4.69587	120.238	0.959137	71.6977	86.7493	83.2284	0.899179
4.6967	120.238	0.756256	73.4248	90.5931	87.7223	0.156726
4.69753	120.238	0.926548	74.246	91.3533	88.7644	3.05646
4.69837	120.238	1.27642	67.2947	81.4139	76.4789	0.192421
4.6992	120.238	1.00385	71.1142	86.7643	83.0296	0.848673
4.70003	120.238	0.913125	71.4492	87.1009	83.4826	0.0980092
4.70086	120.238	1.08153	70.419	84.897	80.9882	1.06985
4.70169	120.238	1.27028	66.7458	80.1651	75.1738	-0.426016
4.70252	120.238	1.45304	64.9208	77.8461	72.339	-0.208051
4.70336	120.238	1.40087	65.4264	78.3895	73.0498	-0.279269
4.70419	120.238	1.10731	70.8016	85.7054	81.8941	1.75399
4.70502	120.238	1.19937	68.118	81.6512	77.102	0.136295
4.70585	120.238	1.04438	69.2004	83.1761	78.9185	-0.585454
4.70668	120.238	1.40956	63.4207	75.2573	69.5798	-2.18849
4.70751	120.238	1.29511	37.7471	40.7584	35.6227
4.70835	120.238	0.807941	28.3096	29.5131	26.3836
4.70918	120.238	1.24366	40.1748	43.7316	38.2661
4.71001	120.238	1.27568	41.7926	45.5697	40.1616
4.71084	120.238	1.36668	68.147	82.1966	77.5728	2.06058
4.71167	120.238	1.1495	71.0772	86.1046	82.3792	2.5201
4.7125	120.238	1.28738	69.6424	83.6983	79.5762	2.66426
4.71334	120.238	1.48734	64.9559	78.031	72.4943	0.203362
4.71417	120.238	1.33766	49.3824	55.6216	49.2038
4.715	120.238	1.28764	65.0393	77.2845	72.0158	-1.93572
4.71583	120.238	1.29048	68.2537	82.2813	77.6976	1.31068
4.71666	120.238	2.2885	56.2853	69.6044	60.1821	-0.267535
4.7175	120.238	2.2813	56.6381	70.5879	60.9765	0.0163323
4.71833	120.238	2.31707	56.4984	70.1293	60.631	0.217924
4.71916	120.238	2.23456	55.8474	68.2483	59.1855	-1.22333
4.71999	120.238	2.13499	57.172	69.4391	61.0905	-0.867285
4.72082	120.238	2.22055	57.5202	70.4993	61.9029	0.314101
4.72165	120.238	1.26212	68.715	85.1433	80.4754	1.45039
4.72249	120.238	1.16286	68.3028	82.781	78.1492	-0.099662
4.72332	120.238	1.03747	71.5679	87.719	84.1397	1.70042
4.72415	120.238	1.27386	73.7198	91.5	88.7983	6.58851
4.72498	120.238	1.00406	72.9277	90.3292	87.2984	2.66466
4.72581	120.238	1.41731	72.8139	89.4912	86.3692	7.29052
4.72664	120.238	1.3796	73.2676	90.6399	87.7308	7.32532
4.72748	120.238	1.0887	71.8738	88.1543	84.6852	2.60867
4.72831	120.238	1.21735	74.0854	92.3705	89.8704	6.30993
4.72914	120.238	1.1248	71.0694	85.8561	82.1402	2.22553
4.72997	120.238	1.08508	71.8358	87.377	83.8922	2.52821
4.7308	120.238	1.11005	73.8482	91.8069	89.1742	4.83255
4.73163	120.238	1.04139	72.6072	89.3576	86.1662	2.78606
4.73247	120.238	1.02156	75.048	93.0348	90.8392	4.99245
4.7333	120.238	0.926445	76.3219	92.9595	90.9969	5.13116
4.73413	120.238	0.894039	76.3963	94.0994	92.3197	4.81456
4.73496	120.238	1.01991	76.5931	94.2266	92.4999	6.51795
4.73579	120.238	1.12199	76.6084	94.5401	92.8715	7.7318
4.73662	120.238	0.992509	76.1708	93.8261	91.9633	5.77048
4.73746	120.238	1.30486	75.9535	92.8024	90.7506	9.17302
4.73829	120.238	0.879268	76.3975	93.4689	91.5895	4.63687
4.73912	120.238	0.73767	76.2996	95.6255	94.1416	2.80106
4.73995	120.238	1.03403	75.4241	93.7013	91.6868	5.51595
4.74078	120.238	0.894261	71.5916	87.4582	83.8871	0.0125471
4.74161	120.238	0.968436	68.6745	82.3029	77.9215	-2.0128
4.74245	120.238	1.084	69.5801	83.6311	79.4891	0.25992
4.74328	120.238	1.23127	72.2441	86.9515	83.6161	4.6279
4.74411	120.238	1.16429	72.9717	88.4546	85.3452	4.58582
4.74494	120.238	1.2962	70.7852	86.0412	82.2062	3.90697
4.74577	120.238	1.42146	59.8898	70.3234	64.0626	-5.58771
4.7466	120.238	0.96539	19.2959	19.6725	18.0737
4.74744	120.238	0.953373	34.5024	37.0647	32.0158
4.74827	120.238	1.13456	19.5075	19.9174	18.1988
4.7491	120.238	0.794139	68.0944	81.3054	76.8055	-4.70604
4.74993	120.238	1.06183	69.4666	83.2979	79.1456	-0.113838
4.75076	120.238	1.11528	71.1751	85.6282	81.9661	2.22034
4.75159	120.238	1.27556	69.7734	83.9864	79.89	2.66149
4.75243	120.238	0.905742	69.5579	83.2753	79.1668	-1.88242
4.75326	120.238	1.12362	68.2969	81.6945	77.2272	-0.560658
4.75409	120.238	0.87396	71.8733	87.6573	84.184	0.0482305
4.75492	120.238	1.67334	61.3928	72.4466	66.3962	-1.35582
4.75575	120.238	1.29818	62.3226	73.0634	67.4544	-4.53338
4.75658	120.238	1.94637	60.3939	71.7381	65.2017	0.47475
4.75742	120.238	2.45215	54.2493	64.932	56.3332	-0.760949
4.75825	120.238	2.50721	53.0867	64.1438	54.7108	-1.41395
4.75908	120.238	1.62788	56.873	66.2437	59.5846	-6.3597
4.75991	120.238	1.03782	28.219	29.6027	25.9728
4.76074	120.238	1.35491	65.3869	77.7547	72.5656	-0.831065
4.76157	120.238	1.41741	69.6509	84.5229	80.321	4.12863
4.76241	120.238	0.894925	68.844	83.2511	78.8184	-2.72699
4.76324	120.238	0.820201	71.501	87.3011	83.6989	-0.979569
4.76407	120.238	1.0491	68.1481	82.6442	77.9549	-1.58214
4.7649	120.238	1.17266	65.807	78.4499	73.3251	-2.4823
4.76573	120.238	0.846399	69.4937	84.9044	80.603	-2.66664
4.76656	120.238	0.709694	69.727	85.1296	80.9134	-4.11994
4.7674	120.238	1.12362	72.1075	88.6173	85.2372	3.24997
4.76823	120.238	1.37572	72.0351	88.2591	84.8461	6.04953
4.76906	120.238	1.33419	70.2762	85.3877	81.3849	3.82591
4.76989	120.238	1.38957	26.9648	28.0294	25.0712
4.77072	120.238	1.29563	63.2597	74.9335	69.261	-3.62503
4.77155	120.238	1.52704	53.466	61.1749	54.6339	-10.8535
4.77239	120.238	1.32203	66.3408	79.6138	74.5149	-0.246138
4.77322	120.238	1.31437	63.6025	75.9724	70.171	-3.07073
4.77405	120.238	1.38892	65.6987	78.6957	73.4418	-0.139792
4.77488	120.238	1.16929	31.8146	33.6007	29.6512
4.77571	120.238	0.961041	38.8013	42.2109	36.6437
4.77654	120.238	1.42022	65.4873	78.1499	72.9122	-0.0038665
4.77738	120.238	1.061	64.5528	76.8106	71.3751	-5.03732
4.77821	120.238	0.959375	66.9686	80.2871	75.3934	-3.82709
4.77904	120.238	1.17114	70.9592	86.7282	82.9361	2.65236
4.77987	120.238	0.985606	70.9911	86.5643	82.7886	0.508563
4.7807	120.238	1.44765	51.3678	58.572	51.814	-13.8204
4.78153	120.238	1.4116	62.7006	74.3936	68.5235	-2.88604
4.78237	120.238	1.12633	67.6521	81.784	76.9741	-1.17395
4.7832	120.238	1.08214	67.5839	81.7015	76.8698	-1.75809
4.78403	120.238	1.32764	68.2093	82.6905	78.0252	1.68551
4.78486	120.238	1.18344	67.3737	81.58	76.6582	-0.791222
4.78569	120.238	1.18991	68.1978	82.4646	77.8258	0.107317
4.78652	120.238	1.58001	66.8054	80.123	75.1739	3.05912
4.78736	120.238	1.23772	62.5177	73.5879	67.9047	-5.02484
4.78819	120.238	1.38066	60.7604	71.3795	65.3182	-5.17
4.78902	120.238	1.31614	62.7056	74.3054	68.4733	-3.9477
4.78985	120.238	1.39773	64.9571	77.7361	72.2834	-0.783436
4.79068	120.238	1.42771	63.9263	76.4568	70.7169	-1.48196
4.79151	120.238	1.24475	65.7516	78.8021	73.5528	-1.71077
4.79235	120.238	1.45649	63.3852	75.5976	69.774	-1.70575
4.79318	120.238	1.22976	64.998	77.652	72.2494	-2.63546
4.79401	120.238	1.27971	64.3228	76.8393	71.2436	-2.74213
4.79484	120.238	1.38448	63.3611	75.5243	69.7095	-2.52681
4.79567	120.238	1.47818	60.1372	70.9903	64.602	-4.71558
4.7965	120.238	1.93128	59.7142	71.608	64.5464	-0.357966
4.79734	120.238	1.64628	58.7452	68.8567	62.3817	-4.29115
4.79817	120.238	2.41442	55.2682	68.2929	58.5168	-0.0939737
4.799	120.238	1.49625	53.1368	61.2708	54.2707	-11.5182
4.80062	61.8557	1.35717	66.3346	80.0879	74.8797	0.141899
4.80223	61.8557	1.26722	74.1612	91.6839	89.1111	6.95458
4.80385	61.8557	1.2124	74.6552	93.3847	91.1692	6.82302
4.80547	61.8557	1.47113	75.4326	93.9537	91.986	10.5026
4.80708	61.8557	1.1926	68.6655	83.6095	79.0501	0.605943
4.8087	61.8557	1.25103	67.6917	81.3392	76.6268	0.3009
4.81032	61.8557	0.948217	68.9198	83.4832	79.058	-2.00953
4.81193	61.8557	1.25047	71.3219	87.5871	83.92	3.92475
4.81355	61.8557	1.23401	70.3956	85.2815	81.3344	2.81073
4.81517	61.8557	1.07225	71.0255	86.9115	83.1407	1.56757
4.81678	61.8557	1.09562	71.6542	87.786	84.2373	2.47
4.8184	61.8557	1.47375	70.3269	86.673	82.6374	5.42552
4.82002	61.8557	1.59629	70.3598	86.515	82.4959	6.78868
4.82163	61.8557	1.30511	66.5247	80.4266	75.2556	-0.252932
4.82325	61.8557	1.30647	63.1903	75.9033	69.8344	-3.57203
4.82487	61.8557	1.49427	62.09	74.2331	67.9686	-2.58675
4.82648	61.8557	1.37249	62.9593	75.1053	69.1547	-3.06227
4.8281	61.8557	1.2149	68.7858	83.2925	78.8272	0.982203
4.82972	61.8557	1.14308	68.0222	82.1692	77.487	-0.609379
4.83133	61.8557	1.04269	73.0347	89.9609	86.9324	3.22889
4.83295	61.8557	1.22508	74.158	91.6615	89.0853	6.47103
4.83457	61.8557	0.822037	75.9207	95.3547	93.7565	3.46261
4.83618	61.8557	1.31285	72.2958	88.9405	85.6328	5.60552
4.8378	61.8557	1.15524	72.8281	89.8971	86.8044	4.33754
4.83942	61.8557	1.18367	68.8537	83.2925	78.8592	0.69136
4.84103	61.8557	1.17143	63.9335	76.1746	70.5326	-4.36988
4.84265	61.8557	1.41579	64.3423	77.2776	71.56	-1.19793
4.84427	61.8557	1.21005	64.2839	76.9887	71.3206	-3.57524
4.84588	61.8557	1.13653	70.7893	86.4686	82.6188	2.08174
4.8475	61.8557	1.19786	67.3635	81.6777	76.7338	-0.635543
4.84912	61.8557	1.06145	70.39	85.3546	81.4004	0.805157
4.85073	61.8557	1.09139	70.1513	85.5878	81.5217	0.917551
4.85235	61.8557	0.882183	69.1972	84.1881	79.8153	-2.52804
4.85397	61.8557	1.04852	70.5504	85.9431	82.0202	0.813292
4.85558	61.8557	0.88224	69.4606	84.4856	80.2035	-2.26394
4.8572	61.8557	1.03794	67.9921	81.8462	77.2006	-1.8697
4.85882	61.8557	1.0136	67.0952	80.614	75.7224	-3.05474
4.86043	61.8557	1.14023	67.567	81.3343	76.5578	-1.09759
4.86205	61.8557	1.13264	70.7336	86.1479	82.2881	1.98092
4.86367	61.8557	1.43955	65.8836	79.012	73.789	0.606108
4.86528	61.8557	1.43135	58.6662	68.5469	62.1766	-6.7019
4.8669	61.8557	1.72705	54.4884	64.3265	56.4664	-7.69323
4.86852	61.8557	2.44441	54.1032	66.5165	56.5466	-0.979021
4.87013	61.8557	2.54035	48.9536	59.0898	48.4071
4.87175	61.8557	2.42064	55.2357	66.8433	58.0217	-0.0682102
4.87337	61.8557	1.88492	57.3107	70.5725	61.7128	-3.23391
4.87498	61.8557	1.33451	45.3614	50.7743	44.1044
4.8766	61.8557	1.50499	54.3556	63.4857	56.1142	-10.2041
4.87822	61.8557	1.65396	62.515	75.3667	68.9922	-0.439459
4.87983	61.8557	1.71364	57.9822	70.3703	62.3198	-4.34056
4.88145	61.8557	2.20848	58.5038	72.5629	63.8838	1.18101
4.88307	61.8557	1.94777	59.9348	71.6594	64.767	0.0298233
4.88468	61.8557	1.27073	63.7245	76.4093	70.5463	-3.44237
4.8863	61.8557	1.01047	66.2391	80.0128	74.7656	-3.94789
4.88792	61.8557	1.77452	60.9736	74.967	67.5107	-0.711246
4.88953	61.8557	2.19648	57.3305	70.7452	61.8089	-0.10874
4.89115	61.8557	2.20564	56.9083	70.31	61.1644	-0.442065
4.89277	61.8557	1.611	59.2341	72.4935	64.5605	-4.17913
4.89438	61.8557	1.35133	65.9986	79.5314	74.2519	-0.259409
4.896	61.8557	1.26019	70.4704	86.4401	82.4668	3.18387
4.89774	57.4257	1.17269	73.3961	91.541	88.763	5.10716
4.89948	57.4257	1.4186	69.9748	83.9484	79.9432	4.46575
4.90122	57.4257	1.25423	68.3734	81.8556	77.399	1.01912
4.90297	57.4257	1.325	66.7002	79.6796	74.77	0.146614
4.90471	57.4257	1.33496	73.1026	90.1876	87.1949	6.66093
4.90645	57.4257	1.27226	73.6744	91.3819	88.6552	6.525
4.90819	57.4257	1.03882	73.482	91.2189	88.4249	3.63053
4.90993	57.4257	1.07755	70.627	84.6982	80.8911	1.23119
4.91167	57.4257	1.3283	71.6581	87.1624	83.6179	5.14164
4.91341	57.4257	1.14211	68.9703	82.9742	78.6365	0.327562
4.91516	57.4257	1.18971	66.7457	79.1117	74.3616	-1.34706
4.9169	57.4257	1.07842	66.2053	78.2081	73.3825	-3.18024
4.91864	57.4257	1.2307	71.6444	86.4221	82.8937	4.02178
4.92038	57.4257	1.44635	70.6034	86.5306	82.607	5.40084
4.92212	57.4257	1.77526	62.8295	74.8066	68.8729	1.15238
4.92386	57.4257	2.09329	61.0581	73.4114	66.6676	2.60846
4.9256	57.4257	1.81916	64.3496	76.9625	71.3462	3.12832
4.92734	57.4257	1.69206	62.0804	74.1915	67.9363	-0.470036
4.92909	57.4257	2.22368	57.7417	69.0485	61.5119	0.565907
4.93083	57.4257	2.13497	61.0042	73.395	66.6138	2.96485
4.93257	57.4257	1.2667	64.0807	77.086	71.2514	-3.13184
4.93431	57.4257	1.16803	68.7636	83.5559	79.0489	0.420779
4.93605	57.4257	1.13248	69.1032	83.9562	79.5636	0.348686
4.93779	57.4257	1.4176	66.983	80.2504	75.3724	1.46287
4.93953	57.4257	1.41286	62.7107	74.2255	68.4284	-2.86188
4.94128	57.4257	1.30127	64.5382	77.0287	71.516	-2.28282
4.94302	57.4257	1.41911	67.4995	80.8726	76.1468	1.99613
4.94476	57.4257	1.62098	64.8461	77.6709	72.1661	1.53965
4.9465	57.4257	1.87258	61.0057	72.9546	66.3671	0.334664
4.94824	57.4257	1.20688	63.3212	74.8685	69.2634	-4.57426
4.94998	57.4257	1.26661	65.7561	78.5927	73.4	-1.45748
4.95172	57.4257	1.39124	62.3864	73.9416	68.0179	-3.42635
4.95347	57.4257	0.997517	72.4933	88.3201	85.0579	2.15249
4.95521	57.4257	0.872913	73.0415	89.1149	86.0437	1.20376
4.95695	57.4257	0.979321	72.2214	87.1646	83.816	1.664
4.95869	57.4257	0.97923	72.3562	87.5964	84.2868	1.7977
4.96043	57.4257	1.31154	73.6751	91.4401	88.7202	6.97003
4.96217	57.4257	1.70027	67.9544	83.0142	78.1781	5.49067
4.96391	57.4257	1.02247	72.3208	89.6156	86.3517	2.27602
4.96566	57.4257	0.966142	73.3691	90.9896	88.1417	2.65432
4.9674	57.4257	1.46507	64.4509	77.6886	71.9215	-0.545738
4.96914	57.4257	2.22779	60.1397	72.7998	65.5471	3.00361
4.97088	57.4257	1.24591	62.2292	73.3317	67.5405	-5.21991
4.97262	57.4257	1.45882	63.6027	76.0374	70.2141	-1.4626
4.97436	57.4257	1.39636	64.4945	76.4583	71.0967	-1.26128
4.9761	57.4257	1.53527	63.483	75.1433	69.5504	-0.747113
4.97784	57.4257	1.57264	63.2882	74.973	69.306	-0.537538
4.97959	57.4257	2.45361	54.4245	65.607	56.7128	-0.572209
4.98133	57.4257	2.50729	51.6135	61.2299	52.3524	-2.88648
4.98307	57.4257	2.56479	54.1537	65.3356	56.3154	0.180763
4.98481	57.4257	2.40201	53.3762	63.9033	55.0351	-2.10215
4.98655	57.4257	1.44253	69.1102	82.9942	78.7189	3.86551
4.98829	57.4257	1.32387	68.1614	82.3781	77.734	1.5951
4.99003	57.4257	1.17458	67.7936	82.3546	77.528	-0.473473
4.99178	57.4257	0.883264	72.4717	88.1575	84.8863	0.759478
4.99352	57.4257	0.932524	75.8865	94.4569	92.6609	4.76886
4.99526	57.4257	1.09286	70.8433	87.4854	83.6429	1.62685
4.997	57.4257	1.25132	69.1156	83.1902	78.8917	1.72815
4.9977	142.857	1.11022	75.347	93.674	91.6407	6.33334
4.9984	142.857	1.20126	74.7907	92.5047	90.1785	6.83068
4.9991	142.857	1.34347	70.7846	86.3035	82.4575	4.43841
4.9998	142.857	1.49477	72.2188	88.8341	85.4975	7.54755
5.0005	142.857	1.23707	69.0962	83.6454	79.2832	1.54623
5.0012	142.857	1.42183	71.919	88.6806	85.2408	6.44567
5.0019	142.857	1.73914	73.0906	90.6228	87.6637	11.0359
5.0026	142.857	1.6701	72.2514	89.1319	85.8186	9.46836
5.0033	142.857	1.53845	67.8418	81.6269	76.9415	3.64621
5.004	142.857	1.21985	69.2116	83.6177	79.3115	1.46476
5.0047	142.857	1.43773	69.5145	84.056	79.8385	4.21695
5.0054	142.857	1.41441	69.515	84.079	79.8593	3.95946
5.0061	142.857	1.47904	66.5308	79.7209	74.7063	1.68749
5.0068	142.857	1.5002	68.286	81.9208	77.4103	3.67404
5.0075	142.857	1.95128	60.8867	73.1	66.3502	1.01728
5.0082	142.857	2.37005	59.9306	72.0859	64.9838	4.15182
5.0089	142.857	2.61891	54.1419	64.2252	56.0378	0.660362
5.0096	142.857	2.56729	58.129	70.3687	62.4654	4.17893
5.0103	142.857	1.52861	68.2684	81.8016	77.302	3.96599
5.011	142.857	1.55658	67.3911	80.8675	76.0852	3.39191
5.0117	142.857	1.92731	62.3295	74.2617	68.1678	2.21701
5.0124	142.857	1.17892	65.5066	78.0303	72.8372	-2.71049
5.0131	142.857	1.32936	68.0514	81.5785	77.0083	1.5468
5.0138	142.857	1.35317	68.269	82.2342	77.6654	2.03148
5.0145	142.857	1.32037	66.679	79.8031	74.8537	0.0734212
5.0152	142.857	1.49443	66.1888	79.3935	74.2579	1.5139
5.0159	142.857	1.20672	66.4368	79.7795	74.698	-1.46053
5.0166	142.857	1.44942	72.734	89.1261	85.9624	7.56519
5.0173	142.857	1.49163	70.3034	85.9396	81.918	5.59787
5.018	142.857	1.34292	70.9418	87.295	83.489	4.58946
5.0187	142.857	1.05377	71.1565	87.0941	83.3691	1.48121
5.0194	142.857	1.25062	68.5242	83.473	78.8616	1.12867
5.0201	142.857	1.39884	70.0195	86.067	81.9243	4.29135
5.0208	142.857	1.11401	74.8915	94.9304	93.0784	5.92203
5.0215	142.857	1.11528	73.8577	91.9716	89.3627	4.90294
5.0222	142.857	1.14953	73.8261	92.1136	89.5168	5.26937
5.0229	142.857	1.16915	74.7143	94.3389	92.3223	6.3845
5.0236	142.857	1.14158	73.5053	90.4348	87.5725	4.85633
5.0243	142.857	1.13149	72.9585	87.1817	84.0776	4.19245
5.025	142.857	1.23183	76.07	94.5234	92.7694	8.46019
5.0257	142.857	0.963552	76.5893	95.4268	93.9351	5.84356
5.0264	142.857	1.2274	75.8482	94.494	92.6992	8.18775
5.0271	142.857	1.27779	71.0978	85.9075	82.1997	4.01113
5.0278	142.857	1.1214	66.9908	79.3337	74.666	-1.89269
5.0285	142.857	1.39513	69.793	83.3261	79.3152	4.02362
5.0292	142.857	1.08607	67.8118	79.9059	75.5443	-1.48408
5.0299	142.857	1.06277	75.7121	93.1907	91.1469	6.14274
5.0306	142.857	0.946108	76.4323	94.3685	92.6418	5.47773
5.0313	142.857	1.26888	75.8424	93.9985	92.1096	8.65463
5.032	142.857	1.16596	72.869	88.9108	85.7804	4.50234
5.0327	142.857	0.917506	73.078	89.3699	86.3201	1.77957
5.0334	142.857	0.946845	76.2777	94.4448	92.7081	5.33192
5.0341	142.857	1.01828	76.0899	93.6796	91.7791	5.99553
5.0348	142.857	0.915558	76.1585	95.0819	93.4558	4.8366
5.0355	142.857	1.07936	74.3787	92.4908	90.0736	5.00419
5.0362	142.857	1.18153	72.2875	89.384	86.0955	4.10052
5.0369	142.857	1.07544	71.0419	86.1703	82.4284	1.62129
5.0376	142.857	1.1065	72.3608	87.5769	84.2689	3.30364
5.0383	142.857	1.04864	67.7639	81.7183	76.9773	-1.9718
5.039	142.857	1.08799	68.1193	81.6777	77.1246	-1.15414
5.0397	142.857	1.41348	69.0319	83.5681	79.1851	3.46612
5.0404	142.857	1.29281	70.6359	85.8983	82.0115	3.71926
5.0411	142.857	1.17161	69.2883	83.9355	79.6292	0.986873
5.0418	142.857	0.904012	70.4984	85.4077	81.494	-0.962756
5.0425	142.857
5.0432	142.857	1.53305	72.3997	88.7945	85.5143	8.14548
5.0439	142.857	1.24022	67.2596	81.933	76.8917	-0.254302
5.0446	142.857	1.32689	67.2715	81.5701	76.5954	0.739216
5.0453	142.857	1.13437	69.2134	83.4606	79.1736	0.48076
5.046	142.857	1.19198	70.0057	87.1392	82.9716	1.9391
5.0467	142.857	0.746245	74.3116	92.1584	89.6799	0.919415
5.0474	142.857	0.898012	73.159	90.2659	87.295	1.6253
5.0481	142.857	2.48186	62.8996	77.4298	70.6497	8.1649
5.0488	142.857	1.30044	65.6845	78.4944	73.2843	-1.14584
5.0495	142.857	1.26373	71.3261	86.6202	82.9682	4.07987
5.0502	142.857	2.45382	64.9961	81.0087	74.8005	10.0014
5.0509	142.857	2.57493	62.7975	76.9764	70.2619	8.91703
5.0516	142.857	2.54489	57.6286	70.3741	61.9612	3.47382
5.0523	142.857	1.09328	74.878	91.7984	89.4039	5.66645
5.053	142.857	0.952017	76.0449	93.497	91.56	5.16113
5.0537	142.857	1.19061	75.6279	92.6973	90.5686	7.54547
5.0544	142.857	0.948755	75.2221	91.6361	89.3016	4.29925
5.0551	142.857	1.06179	73.4951	90.0549	87.1623	3.91424
5.0558	142.857	1.37451	75.7683	94.6523	92.877	9.76928
5.0565	142.857	1.39611	74.501	92.458	90.0628	8.74251
5.0572	142.857	1.14063	67.536	81.0806	76.3344	-1.12389
5.0579	142.857	1.08575	73.932	89.9544	87.175	4.63231
5.0586	142.857	1.04258	74.5382	90.9339	88.3773	4.73096
5.0593	142.857	0.948804	74.7104	90.81	88.2856	3.78813
5.06	142.857	0.790496	76.7033	94.6475	93.013	3.858
5.0607	142.857	1.03092	75.9569	93.9398	92.06	6.01212
5.0614	142.857	1.02185	76.2049	93.5409	91.6388	6.15274
5.0621	142.857	1.39594	70.4407	85.322	81.3905	4.68024
5.0628	142.857	1.40617	70.9766	87.1324	83.3403	5.3297
5.0635	142.857	1.20986	70.3545	85.7086	81.7189	2.49323
5.0642	142.857	1.35116	69.9948	85.5208	81.3936	3.7348
5.0649	142.857	1.35736	68.156	82.0002	77.412	1.96544
5.0656	142.857	1.31345	66.3288	79.1046	74.1197	-0.354873
5.0663	142.857	1.43685	72.7421	89.0365	85.8717	7.43475
5.067	142.857	0.949975
5.0677	142.857	1.17823	75.7493	94.3134	92.4673	7.52422
5.0684	142.857	1.20892	71.1578	86.5433	82.8311	3.28578
5.0691	142.857	1.3774	71.4073	86.4133	82.7984	5.44045
5.0698	142.857	1.18373	76.3698	94.6846	93.0077	8.20809
5.0705	142.857	1.03619	76.189	94.6877	92.9842	6.30641
5.0712	142.857	1.30918	76.047	94.2246	92.4105	9.31529
5.0719	142.857	2.32303	63.1518	77.0997	70.6081	6.928
5.0726	142.857	2.31181	59.5011	71.7545	64.4292	3.1706
5.0733	142.857	2.30561	61.704	74.622	67.9021	5.31442
5.074	142.857	2.42653	60.1823	72.203	65.2651	4.93332
5.0747	142.857	2.09243	72.0932	87.3597	83.9639	13.6351
5.0754	142.857	2.4632	61.0133	73.6676	66.7771	6.10572
5.0761	142.857	1.38735	59.4968	71.6777	64.3865	-6.35907
5.0768	142.857	2.14549	61.0596	73.3833	66.6528	3.1232
5.0775	142.857	1.82732	63.5823	76.7342	70.6667	2.44544
5.0782	142.857	1.78228	65.1366	78.134	72.6832	3.53254
5.0789	142.857	1.82062	63.6972	75.8452	70.1529	2.49105
5.0796	142.857	1.82778	63.8216	76.408	70.6124	2.68949
5.0803	142.857	1.86623	63.9272	77.1644	71.2011	3.19109
5.081	142.857	1.51472	68.6896	82.7736	78.3305	4.23611
5.0817	142.857	1.52769	66.342	80.7034	75.372	2.02966
5.0824	142.857	1.49686	69.2018	84.8743	80.4457	4.55341
5.0831	142.857	0.883718	74.6871	92.3409	89.9702	2.98038
5.0838	142.857	1.03334	73.7512	90.9875	88.2388	3.83505
5.0845	142.857	0.911104	74.7533	92.7394	90.439	3.3777
5.0852	142.857	0.967642	74.8096	92.6971	90.4022	4.1128
5.0859	142.857	1.58242	66.9074	81.0625	75.981	3.18702
5.0866	142.857	1.05744	69.7204	84.8762	80.6754	0.0883136
5.0873	142.857	1.34136	69.5368	84.9893	80.7005	3.1669
5.088	142.857	1.03846	72.2059	88.9964	85.6624	2.35019
5.0887	142.857	1.46316	68.0901	83.884	79.0168	3.07251
5.0894	142.857	1.43621	65.7391	81.1122	75.3471	0.424675
5.0901	142.857	1.36528	70.6989	86.8744	82.9804	4.59689
5.0908	142.857	1.11926	70.235	86.439	82.3721	1.32656
5.0915	142.857	1.72999	64.4448	78.5205	72.5181	2.29402
5.0922	142.857	1.65475	63.4181	76.9491	70.6969	0.472004
5.0929	142.857	1.57514	62.889	75.0255	69.0533	-0.90976
5.0936	142.857	1.56412	62.4734	74.7694	68.5866	-1.44426
5.0943	142.857	1.60414	60.9089	72.8951	66.2543	-2.57794
5.095	142.857	1.55083	59.6483	70.7955	64.0833	-4.41313
5.0957	142.857	2.04391	60.2144	74.6981	66.6845	1.27493
5.0964	142.857	2.06381	59.9822	74.4499	66.3283	1.24062
5.0971	142.857	2.12824	59.8166	74.5518	66.2339	1.71118
5.0978	142.857	1.4683	59.625	71.679	64.5027	-5.33613
5.0985	142.857	1.80141	55.216	65.6538	57.6477	-6.18916
5.0992	142.857	1.49647	62.5372	76.4575	69.7166	-2.11544
5.0999	142.857	1.77541	62.221	75.9509	69.1416	0.545425
5.1006	142.857	2.04323	61.1025	75.565	67.988	2.15621
5.1013	142.857	2.34809	57.3847	72.6295	62.7277	1.39852
5.102	142.857	2.15652	62.5176	77.7151	70.558	4.68921
5.1027	142.857	2.46106	56.5431	71.6943	61.3332	1.61568
5.1034	142.857	2.41826	57.0657	72.1914	62.1622	1.73954
5.1041	142.857	2.47588	55.4768	70.2754	59.4617	0.686766
5.1048	142.857	2.54702	54.6027	69.0415	57.912	0.467431
5.1055	142.857	2.56956	53.0651	66.9008	55.2271	-0.864429
5.1062	142.857	2.5864	52.9436	67.0056	55.0727	-0.832619
5.1069	142.857	2.55447	52.6415	66.3843	54.508	-1.42562
5.1076	142.857	2.55475	52.0499	64.8399	53.3856	-2.01467
5.1083	142.857	2.53584	51.0371	63.3687	51.6979	-3.2006
5.109	142.857	2.4685	52.8782	66.2105	54.8189	-1.98019
5.1097	142.857	2.55327	54.1177	68.6043	57.128	0.039542
5.1104	142.857	1.50061	74.5781	93.4073	91.1807	9.97065
5.1111	142.857	0.980867	68.0085	81.4053	76.8439	-2.5305
5.1118	142.857	0.857875	72.3832	88.9055	85.624	0.362617
5.1125	142.857	1.03687	67.7111	84.856	79.7213	-2.16349
5.1132	142.857	2.34421	56.302	72.1049	61.2201	0.27906
5.1139	142.857	2.31143	56.581	72.2568	61.625	0.246874
5.1146	142.857	2.40755	54.3041	70.4315	57.9406	-1.12227
5.1153	142.857	2.41389	53.2907	68.6483	55.9552	-2.07636
5.116	142.857	2.38968	53.7239	70.1316	56.9986	-1.8702
5.1167	142.857	1.94762	57.1134	72.5473	62.3816	-2.79308
5.1174	142.857	2.19702	56.7994	72.9706	62.2121	-0.634589
5.1181	142.857	2.15477	56.7322	71.9153	61.6524	-1.1133
5.1188	142.857	2.10035	55.0892	69.2253	58.6026	-3.29071
5.1195	142.857	1.93131	56.8175	71.3851	61.5188	-3.25433
5.1202	142.857	1.92877	56.3101	69.4942	60.1683	-3.78749
5.1209	142.857	2.02967	56.446	71.2531	61.0305	-2.63552
5.1216	142.857	2.24202	52.7085	66.4511	54.619	-4.29033
5.1223	142.857	2.06957	55.2358	69.3821	58.841	-3.44867
5.123	142.857	2.00222	57.0305	71.7622	61.9276	-2.32578
5.1237	142.857	1.25753	67.6434	82.5949	77.6561	0.326618
5.1244	142.857	1.33191	64.9227	79.8031	73.7974	-1.55312
5.1251	142.857	2.25454	62.5727	77.1815	70.2314	5.69426
5.1258	142.857	2.05605	60.085	73.3832	65.8179	1.26623
5.1265	142.857	2.43114	53.8605	66.6885	56.2743	-1.34542
5.1272	142.857	2.48429	56.4001	69.5082	60.2758	1.68787
5.1279	142.857	1.09272	73.0459	89.8994	86.8699	3.82785
5.1286	142.857	1.16587	74.4274	91.8478	89.3566	6.05969
5.1293	142.857	1.14656	75.1806	95.0428	93.2629	6.58948
5.13	142.857	1.24886	74.2776	93.8188	91.6121	6.86211
5.1307	142.857	0.775974	73.5921	91.5206	88.7895	0.567779
5.1314	142.857	0.926445	73.2561	90.5457	87.625	2.06531
5.1321	142.857	0.86463	71.3272	88.0226	84.3623	-0.61115
5.1328	142.857	0.917295	73.9617	90.913	88.2112	2.66082
5.1335	142.857	1.08927	74.0416	91.952	89.3841	4.78309
5.1342	142.857	0.820924	74.8867	92.2507	89.9115	2.41498
5.1349	142.857	1.10884	72.071	88.5078	85.1124	3.04114
5.1356	142.857	0.849297	74.0183	92.1056	89.5527	1.89326
5.1363	142.857	1.03695	74.8443	92.9277	90.6745	4.97069
5.137	142.857	0.992907	73.4507	90.7033	87.8493	3.05513
5.1377	142.857	0.788663	73.6866	90.4993	87.6908	0.818751
5.1384	142.857	1.37672	74.4312	91.6356	89.121	8.45687
5.1391	142.857	1.10425	74.4011	91.4992	88.9627	5.31773
5.1398	142.857	1.26715	72.079	87.6259	84.2229	4.87151
5.1405	142.857	1.01999	75.5822	91.7718	89.5289	5.50804
5.1412	142.857	1.20477	73.1429	89.5256	86.5024	5.2232
5.1419	142.857	0.739651	73.1388	89.7936	86.7841	-0.335126
5.1426	142.857	1.1407	72.6241	88.8054	85.5961	3.96495
5.1433	142.857	0.972527	70.2061	84.6247	80.6508	-0.432374
5.144	142.857	0.920019	69.9666	84.041	80.0223	-1.30153
5.1447	142.857	0.851014	74.9843	91.6639	89.2791	2.88017
5.1454	142.857	0.975662	73.1806	89.1015	86.0712	2.57955
5.1461	142.857	1.06532	68.6628	81.7138	77.4224	-0.876607
5.1468	142.857	1.12218	69.8057	83.7016	79.6508	0.931356
5.1475	142.857	1.11481	71.3755	86.6188	82.985	2.41533
5.1482	142.857	1.39756	73.7115	90.3037	87.4871	7.96903
5.1489	142.857	0.898176	73.8333	91.5455	88.8771	2.3016
5.1496	142.857	0.966283	72.8089	89.4678	86.343	2.09583
5.1503	142.857	1.02338	73.3053	90.1169	87.1759	3.27126
5.151	142.857	1.17551	70.4173	85.3662	81.4224	2.16094
5.1517	142.857	1.02894	68.9919	83.1755	78.8216	-0.976327
5.1524	142.857	1.07947	50.323	56.7269	50.4172
5.1531	142.857	0.999043	65.7363	78.9447	73.6503	-4.58632
5.1538	142.857	1.26186	66.8932	80.7408	75.7131	-0.374365
5.1545	142.857	1.27395	65.3288	78.8753	73.349	-1.80141
5.1552	142.857	1.30012	64.9742	78.7763	73.0518	-1.85987
5.1559	142.857	1.26874	62.4202	75.4764	68.9902	-4.76912
5.1566	142.857	1.19543	62.734	75.244	69.0777	-5.29303
5.1573	142.857	1.38453	60.8357	72.3968	65.9203	-5.05166
5.158	142.857	1.52375	59.2558	70.2068	63.4525	-5.0995
5.1587	142.857	1.22832	61.4318	72.5081	66.461	-6.21806
5.1594	142.857	1.40211	57.7239	68.331	61.2016	-7.96802
5.1601	142.857	1.46073	62.0954	73.9274	67.7899	-2.94889
5.1608	142.857	1.69627	58.7037	70.4111	63.0402	-3.80228
5.1615	142.857	1.98236	57.6667	70.6161	62.107	-1.8891
5.1622	142.857	1.71431	59.723	71.8497	64.6775	-2.59269
5.1629	142.857	1.87413	58.3404	69.8234	62.4282	-2.31472
5.1636	142.857	2.0627	55.3862	67.6815	58.46	-3.36641
5.1643	142.857	2.07953	56.5021	69.3762	60.3395	-2.08361
5.165	142.857	2.07095	57.246	70.2592	61.5095	-1.42476
5.1657	142.857	2.06532	55.9565	68.6568	59.4542	-2.77015
5.1664	142.857	2.06384	56.5299	69.7949	60.534	-2.2114
5.1671	142.857	2.18998	57.9611	71.8526	62.98	0.458729
5.1678	142.857	2.11437	55.9052	69.2334	59.6023	-2.33667
5.1685	142.857	2.22248	55.7743	69.4069	59.5103	-1.41301
5.1692	142.857	2.34366	55.3023	69.7524	59.0534	-0.725791
5.1699	142.857	1.26781	65.6788	81.0528	75.2622	-1.52118
5.1706	142.857	1.20855	68.7365	83.1542	78.6828	0.860163
5.1713	142.857	1.02403	71.642	86.8978	83.3529	1.61569
5.172	142.857	1.25912	65.3648	78.6887	73.2324	-1.93396
5.1727	142.857	0.871164	70.5544	85.5272	81.6285	-1.30459
5.1734	142.857	0.894039	71.5283	86.9414	83.3546	-0.0534494
5.1741	142.857	0.975386	69.5452	83.1946	79.0908	-1.05921
5.1748	142.857	1.0408	68.5175	81.8684	77.4804	-1.31068
5.1755	142.857	1.01009	67.1854	79.0335	74.5444	-3.00616
5.1762	142.857	1.24316	70.6709	84.6535	80.8682	3.19051
5.1769	142.857	1.25626	67.3493	81.3156	76.4273	0.0181123
5.1776	142.857	1.4019	71.5512	87.3864	83.8015	5.85695
5.1783	142.857	1.50395	62.5609	76.9049	70.0344	-2.01
5.179	142.857	0.875235	75.4492	91.8715	89.61	3.63966
5.1797	142.857	1.16331	77.0751	94.402	92.7786	8.67784
5.1804	142.857	0.783761	77.499	96.248	95.0507	4.57066
5.1811	142.857	1.06115	75.2602	92.5075	90.28	5.67181
5.1818	142.857	1.2275	75.0883	92.1004	89.7864	7.42898
5.1825	142.857	1.29217	71.1313	85.7474	82.0614	4.20743
5.1832	142.857	2.27515	53.4279	65.9212	55.5203	-3.25267
5.1839	142.857	2.48303	53.3127	66.0617	55.395	-1.4112
5.1846	142.857	2.49322	58.3375	71.9494	63.4124	3.70783
5.1853	142.857	1.35239	64.1348	77.4154	71.5174	-2.11139
5.186	142.857	1.41379	67.6895	81.6937	76.9184	2.12712
5.1867	142.857	2.51412	53.0232	66.1361	55.0097	-1.41391
5.1874	142.857	2.50809	52.5563	66.2047	54.3497	-1.93633
5.1881	142.857	1.6858	68.1683	82.874	78.1633	5.55153
5.1888	142.857	2.05508	70.1736	85.988	81.9116	11.3452
5.1895	142.857	1.36044	65.6567	79.0473	73.6792	-0.499452
5.1902	142.857	1.36745	71.3404	88.3492	84.7019	5.26253
5.1909	142.857	1.65216	72.1992	89.2986	85.9776	9.22553
5.1916	142.857	1.43759	73.6175	90.388	87.5523	8.3183
5.1923	142.857	1.23147	71.8427	88.5079	85.0369	4.22874
5.193	142.857	1.48561	67.0365	82.0562	76.875	2.26511
5.1937	142.857	1.3354	70.0843	85.9154	81.8055	3.64762
5.1944	142.857	1.42847	70.0207	85.0428	80.9575	4.6208
5.1951	142.857	1.4565	65.0637	79.0465	73.3107	-0.0271121
5.1958	142.857	1.62574	66.9014	81.8424	76.6213	3.64599
5.1965	142.857	2.44443	55.0108	67.4477	57.9383	-0.071242
5.1972	142.857	1.17719	70.7777	86.8408	82.9775	2.54069
5.1979	142.857	1.20008	73.4568	89.6659	86.7399	5.48333
5.1986	142.857	1.47368	67.9927	81.7679	77.1356	3.09053
5.1993	142.857	1.39527	66.8811	79.5671	74.7842	1.11325
5.2	142.857	1.3141	67.3381	81.3048	76.4125	0.661832
5.2007	142.857	1.4796	66.7782	80.6364	75.5656	1.94102
5.2014	142.857	1.25515	61.0962	74.7423	67.4785	-6.24765
5.2021	142.857	1.12778	73.0927	89.2542	86.2037	4.28355
5.2028	142.857	1.2721	71.9971	88.4532	85.032	4.84588
5.2035	142.857	1.287	73.5449	93.0058	90.4891	6.56253
5.2042	142.857	1.2259	75.9222	97.2911	96.2301	8.24461
5.2049	142.857	1.39568	76.3219	96.4509	95.1796	10.5585
5.2056	142.857	1.13583	76.2803	96.1685	94.8172	7.56472
5.2063	142.857	1.43511	75.5202	94.2607	92.3664	10.1937
5.207	142.857	1.23396	71.2855	86.6301	82.9628	3.70001
5.2077	142.857	1.36644	69.5157	84.5161	80.2555	3.4266
5.2084	142.857	0.950511	75.4915	93.6004	91.5809	4.58973
5.2091	142.857	1.01703	72.6582	87.8434	84.6315	2.54905
5.2098	142.857	1.34199	73.8394	90.0189	87.2182	7.47664
5.2105	142.857	1.31224	70.0289	83.8423	79.872	3.33167
5.2112	142.857	1.24418	69.7365	83.4305	79.3817	2.26761
5.2119	142.857	1.29367	72.2165	85.8038	82.5138	5.30964
5.2126	142.857	1.03278	70.0234	83.9773	79.9898	0.100561
5.2133	142.857	1.24423	69.6982	83.4305	79.3649	2.22991
5.214	142.857	1.24257	69.0058	82.5383	78.2786	1.51858
5.2147	142.857	1.20003	71.6452	87.6421	84.0896	3.67102
5.2154	142.857	1.26193	72.0826	87.6935	84.2915	4.81587
5.2161	142.857	1.08983	73.9348	90.151	87.3839	4.68295
5.2168	142.857	1.31727	72.3269	87.7973	84.477	5.6863
5.2175	142.857	1.2683	70.9758	85.5508	81.8169	3.78142
5.2182	142.857	1.02955	72.4685	88.1472	84.8748	2.50741
5.2189	142.857	0.977403	76.2087	94.5217	92.7888	5.62837
5.2196	142.857	0.972249	75.5168	93.9868	92.0399	4.87496
5.2203	142.857	0.991004	74.9239	93.5494	91.4153	4.50565
5.221	142.857	1.19532	72.178	88.4874	85.1266	4.1497
5.2217	142.857	1.22634	70.9163	86.5541	82.7504	3.24376
5.2224	142.857	1.26126	70.7179	85.9752	82.117	3.4436
5.2231	142.857	1.3049	71.9325	88.3633	84.9184	5.15251
5.2238	142.857	1.16095	71.7243	87.6642	84.1393	3.29977
5.2245	142.857	1.3813	72.1899	88.322	84.9614	6.26654
5.2252	142.857	1.03423	72.6358	88.0317	84.8126	2.73008
5.2259	142.857	1.14517	75.3756	92.4867	90.2802	6.76833
5.2266	142.857	0.850033	69.2243	83.487	79.2018	-2.89178
5.2273	142.857	1.39019	66.3539	79.6685	74.5646	0.52958
5.228	142.857	1.60026	62.8393	74.5272	68.7068	-0.689108
5.2287	142.857	1.52613	68.3497	83.5974	78.8876	4.02034
5.2294	142.857	1.84333	64.7194	78.76	72.8754	3.74764
5.2301	142.857	2.34267	57.484	69.8645	61.5926	1.44655
5.2308	142.857	2.33597	56.5928	68.3704	60.058	0.491789
5.2315	142.857	2.45939	53.0542	63.9886	54.64	-1.8887
5.2322	142.857	1.51422	73.3967	90.1285	87.2137	8.93772
5.2329	142.857	1.02898	70.1378	83.8673	79.9407	0.169996
5.2336	142.857	1.15897	69.8777	84.5188	80.4153	1.43022
5.2343	142.857	1.18381	68.8766	82.78	78.4248	0.715911
5.235	142.857	1.15993	68.9981	83.0885	78.7487	0.561708
5.23708	48.1771	0.980276	75.5245	92.8381	90.7079	4.97841
5.23915	48.1771	0.975891	74.1176	89.5131	86.7637	3.51925
5.24123	48.1771	1.00834	71.784	86.1527	82.6873	1.57178
5.2433	48.1771	0.833784	76.2051	94.4132	92.6592	3.89073
5.24538	48.1771	1.64212	76.9075	95.8506	94.4945	13.8269
5.24745	48.1771	1.39787	76.8668	95.8414	94.4784	11.1278
5.24953	48.1771	1.30209	73.9786	90.8392	88.1351	7.1669
5.25161	48.1771	1.43439	67.1238	80.3038	75.4915	1.78937
5.25368	48.1771	1.23055	68.1553	81.7759	77.2243	0.530919
5.25576	48.1771	1.26979	65.1056	77.5703	72.2592	-2.07182
5.25783	48.1771	1.20825	76.0275	96.8331	95.6399	8.14777
5.25991	48.1771	1.01305	72.2407	89.4332	86.133	2.08425
5.26198	48.1771	1.1522	72.1268	89.9723	86.6756	3.60094
5.26406	48.1771	1.25203	71.9321	87.8154	84.3625	4.55273
5.26614	48.1771	1.38016	71.3996	87.6604	84.0214	5.46355
5.26821	48.1771	1.42607	72.9601	89.6072	86.5349	7.53364
5.27029	48.1771	1.46147	71.675	87.7481	84.2064	6.63876
5.27236	48.1771	1.63812	71.7002	87.8347	84.3022	8.57686
5.27444	48.1771	2.16554	61.7319	75.3227	68.356	3.99149
5.27651	48.1771	2.45388
5.27859	48.1771	2.45005	55.7793	68.3638	59.1468	0.749587
5.28066	48.1771	2.47511	54.0849	65.54	56.2802	-0.712316
5.28274	48.1771	2.43962	53.4453	65.0846	55.3638	-1.68145
5.28482	48.1771	2.50169	52.9849	64.6714	54.6742	-1.56669
5.28689	48.1771	2.52546	51.0006	62.361	51.5741	-3.33228
5.28897	48.1771	1.61084	71.1722	86.7865	83.0729	7.75724
5.29104	48.1771	1.4914	74.2246	90.123	87.4307	9.51659
5.29312	48.1771	1.50096	62.9411	74.3264	68.6568	-1.66241
5.29519	48.1771	1.447	66.826	79.9553	75.0542	1.63064
5.29727	48.1771	1.52965	68.0934	81.8404	77.2469	3.80226
5.29935	48.1771	1.32703	68.7085	82.8465	78.4024	2.17773
5.30142	48.1771	1.48701	68.435	82.8465	78.2706	3.67898
5.3035	48.1771	1.77689	64.4987	77.5147	71.8299	2.8386
5.30557	48.1771	1.8642	61.9735	74.6784	68.1487	1.21656
5.30765	48.1771	1.60373	64.6977	78.2736	72.5039	1.20641
5.30972	48.1771	1.32976	72.1343	89.2628	85.9193	5.63434
5.3118	48.1771	1.40126	68.9602	84.0631	79.594	3.25893
5.31388	48.1771	1.40288	69.7383	84.294	80.1512	4.05495
5.31595	48.1771	1.22968	69.2236	83.657	79.3518	1.58927
5.31803	48.1771	1.35209	68.2419	82.4468	77.8325	1.99224
5.3201	48.1771	1.50417	69.5556	83.8853	79.7039	4.98703
5.32218	48.1771	1.05138	69.8871	84.2657	80.19	0.18375
5.32425	48.1771	1.35388	60.8974	71.7842	65.6419	-5.33219
5.32633	48.1771	1.33189	65.9302	78.1648	73.1896	-0.545905
5.32841	48.1771	1.79707	60.2299	71.1914	64.7819	-1.22031
5.33048	48.1771	1.05591	75.8841	94.1417	92.2856	6.23407
5.33256	48.1771	1.53241	73.2588	89.6665	86.6842	8.9977
5.33463	48.1771	1.45108	71.8763	87.2905	83.8208	6.72582
5.33671	48.1771	1.44809	68.7432	83.5172	79.0051	3.55976
5.33878	48.1771	1.0141	74.5267	91.0867	88.5404	4.38276
5.34086	48.1771	1.4804	72.703	89.1646	85.9931	7.87451
5.34294	48.1771	0.812312	73.0889	89.5586	86.5214	0.511688
5.34501	48.1771	0.761251	75.3567	93.3489	91.2627	2.15042
5.34709	48.1771		70.1977	85.1954	81.173	-13.0593
5.34916	48.1771	1.37654	68.5937	82.3117	77.89	2.61732
5.35124	48.1771		75.8938	94.41	92.6061	-7.36316
5.35331	48.1771	1.08842	71.8724	87.9657	84.4936	2.60401
5.35539	48.1771	1.21903	67.7856	82.6442	77.7718	0.0294078
5.35746	48.1771	1.39856	72.431	88.8074	85.5375	6.69978
5.35954	48.1771	1.56827	67.8282	82.273	77.4763	3.95537
5.36162	48.1771	1.1456	74.4766	91.4848	88.9647	5.87432
5.36369	48.1771	1.11096	75.7869	93.2297	91.2056	6.78179
5.36577	48.1771	1.08799	74.4482	90.4663	87.8527	5.17477
5.36784	48.1771	1.15524	75.2007	91.2988	88.9288	6.71015
5.36992	48.1771	0.853577	75.1127	91.5303	89.1613	3.03978
5.37199	48.1771	0.902221	73.5427	89.093	86.1684	2.0599
5.37407	48.1771		71.189	87.2935	83.5786	-12.068
5.37615	48.1771	1.0177	71.6501	88.4968	84.9607	1.54884
5.37822	48.1771	1.19476	72.6659	89.7428	86.5917	4.63123
5.3803	48.1771	0.830525	73.8194	91.4075	88.7199	1.46522
5.38237	48.1771	1.05434	72.9849	90.3545	87.342	3.3164
5.38445	48.1771	0.928037	73.7167	90.309	87.4942	2.54506
5.38652	48.1771	0.932322	74.3251	91.7783	89.2552	3.20499
5.3886	48.1771	1.06922	74.6479	91.7737	89.3245	5.15436
5.39068	48.1771	0.912913	75.2531	91.8661	89.5617	3.89937
5.39275	48.1771	0.729813	74.6852	91.9855	89.5693	1.08892
5.39483	48.1771	1.3194	72.4185	89.7428	86.5174	5.80193
5.3969	48.1771	1.17082	70.2814	86.679	82.6252	1.97084
5.39898	48.1771	1.56424	63.9501	76.5273	70.7806	0.0336985
5.40105	48.1771	1.28407	69.9637	86.593	82.4128	2.94813
5.40313	48.1771	1.39677	73.0681	90.2465	87.2486	7.31698
5.40521	48.1771	1.16155	67.5641	81.3602	76.5775	-0.853582
5.40728	48.1771	1.50868	65.323	79.5521	73.8575	0.803618
5.40936	48.1771	1.09419	70.3932	85.1675	81.2275	1.19234
5.41143	48.1771	1.13226	66.7107	81.2424	76.0185	-2.04641
5.41351	48.1771	1.37431	63.9043	76.6822	70.8544	-2.09694
5.41558	48.1771	1.74905	66.484	80.0095	74.904	4.53303
5.41766	48.1771	1.4139	63.7508	76.8969	70.8952	-1.81026
5.41974	48.1771	1.49701	66.612	82.4089	76.9403	1.96531
5.42181	48.1771	1.34653	64.8753	78.1395	72.5213	-1.43658
5.42389	48.1771	1.99512	64.7886	77.5412	72.0372	5.3611
5.42596	48.1771	0.969463	71.914	87.5429	84.0839	1.23894
5.42804	48.1771	0.841109	68.7465	82.5886	78.1989	-3.47838
5.43011	48.1771	2.01508	65.0805	79.5184	73.6793	5.85318
5.43219	48.1771	0.998477	75.3977	93.8786	91.891	5.06833
5.43426	48.1771	0.758382	74.9618	93.3867	91.2315	1.72006
5.43634	48.1771	0.765445	74.0057	91.7336	89.1296	0.851367
5.43842	48.1771	1.38545	70.7277	87.3922	83.5059	4.85055
5.44049	48.1771	1.34242	70.4638	86.08	82.1167	4.1059
5.44257	48.1771	1.52917	61.3717	73.909	67.2107	-2.92459
5.44464	48.1771	1.72724	61.654	74.9133	68.04	-0.525719
5.44672	48.1771	1.2441	65.8158	79.0354	73.7662	-1.6539
5.44879	48.1771	1.45638	64.8245	77.5683	72.0794	-0.267593
5.45087	48.1771	1.98206	57.2056	69.687	61.2274	-2.3532
5.45295	48.1771	2.05199	57.0189	70.3469	61.3012	-1.84014
5.45502	48.1771	1.98763	58.9678	72.032	64.0722	-0.535046
5.4571	48.1771	1.92462	57.7911	70.6352	62.2439	-2.34871
5.45917	48.1771	2.2898	53.9656	67.1856	56.5388	-2.57484
5.46125	48.1771	2.39596	55.4564	70.4019	59.4824	-0.0787488
5.46332	48.1771	2.4617	54.5126	68.2337	57.5484	-0.408964
5.4654	48.1771	2.51636	52.8072	66.6511	54.802	-1.60934
5.46748	48.1771	2.33269	54.8453	67.3567	57.7093	-1.2868
5.46955	48.1771	2.42748	53.579	65.6269	55.6555	-1.66103
5.47163	48.1771	2.66035	51.0013	62.0391	51.5544	-2.10704
5.4737	48.1771	2.39586	54.3198	65.2021	56.4843	-1.21615
5.47578	48.1771	2.52188	51.8815	62.5816	52.8593	-2.4842
5.47785	48.1771	2.52453	50.9385	62.0447	51.4619	-3.4029
5.47993	48.1771	1.89495	61.7188	74.4758	67.8255	1.27672
5.48201	48.1771	2.39991	53.7343	65.3849	55.802	-1.76372
5.48408	48.1771	2.63003	49.7637	60.8378	49.6284
5.48616	48.1771	2.59804	50.0536	61.0054	50.0837	-3.61686
5.48823	48.1771	2.36614	53.4963	65.1393	55.4415	-2.31938
5.49031	48.1771	2.53059	52.4877	63.81	53.8562	-1.7981
5.49238	48.1771	2.2919	59.784	72.2306	64.9291	3.26365
5.49446	48.1771	2.08498	55.9102	69.241	59.6109	-2.62166
5.49654	48.1771	2.29821	56.6857	71.3379	61.3468	0.225613
5.49861	48.1771	2.16454	57.5113	71.5354	62.3559	-0.23876
5.50069	48.1771	2.07759	59.3855	74.1339	65.5876	0.7806
5.50276	48.1771	2.40236	56.5023	71.6488	61.2652	1.02725
5.50484	48.1771	2.34532	55.9534	70.9754	60.3232	-0.059067
5.50691	48.1771	2.53883	54.5227	68.8985	57.7616	0.312462
5.50899	48.1771	2.55589	53.8034	67.781	56.4732	-0.250771
5.51106	48.1771	2.30184	60.1052	73.9857	66.174	3.67972
5.51314	48.1771	1.27328	74.6779	91.3975	88.9158	7.54
5.51522	48.1771	1.0974	73.2719	89.7705	86.7978	4.10847
5.51729	48.1771	0.806655	74.3807	92.0274	89.5475	1.73403
5.51937	48.1771	0.858778	72.5559	88.9034	85.676	0.546303
5.52144	48.1771	0.918135	71.0343	86.4967	82.7395	-0.256456
5.52352	48.1771	0.827886	73.3295	91.0364	88.183	0.943002
5.52559	48.1771	0.792882	74.8746	93.1687	90.9599	2.05862
5.52767	48.1771	1.08736	75.7795	94.7039	92.9411	6.49863
5.52975	48.1771	1.00411	74.8401	93.5257	91.3714	4.57762
5.53182	48.1771	1.02305	75.4065	93.4287	91.3649	5.36852
5.5339	48.1771	0.95708	76.4669	95.2987	93.7626	5.6438
5.53597	48.1771	0.923503	75.4925	94.4683	92.6111	4.26632
5.53805	48.1771	1.37619	74.6522	93.1868	90.9366	8.67198
5.54012	48.1771	1.0267	72.1514	89.013	85.6623	2.15661
5.5422	48.1771	1.15603	72.721	90.1632	87.0594	4.23954
5.54428	48.1771	1.10544	68.828	83.7565	79.2575	-0.241473
5.54635	48.1771	1.33806	62.8651	74.1011	68.4648	-3.54176
5.54843	48.1771	1.39	67.7572	82.126	77.3154	1.93067
5.5505	48.1771	0.942157	72.3662	88.7294	85.4363	1.36421
5.55258	48.1771	0.934094	74.8749	93.0616	90.8356	3.77612
5.55465	48.1771	0.769525	74.5002	92.8148	90.4727	1.39625
5.55673	48.1771	0.67006	73.8625	91.4168	88.7409	-0.480716
5.55881	48.1771	1.4681	70.809	86.0963	82.268	5.84557
5.56088	48.1771	1.16274	69.2828	83.9321	79.6236	0.878974
5.56296	48.1771	1.1486	71.4069	87.4785	83.8418	2.83945
5.56503	48.1771	1.01106	70.1897	85.2974	81.2648	0.00971602
5.56711	48.1771	0.993568	69.2613	84.1656	79.824	-1.12642
5.56918	48.1771	1.25088	73.1794	91.5714	88.7419	5.78697
5.57126	48.1771	1.19487	72.3458	87.9592	84.6454	4.31243
5.57334	48.1771	1.03463	73.2818	89.1778	86.18	3.3808
5.57541	48.1771	1.17961	72.7193	88.4055	85.2166	4.51014
5.57749	48.1771	0.900203	73.114	89.7389	86.719	1.60682
5.57956	48.1771	1.0406	69.113	84.564	80.1195	-0.717446
5.58164	48.1771	1.02073	63.5691	75.3035	69.7127	-6.49625
5.58371	48.1771	1.38019	69.1539	82.4312	78.2565	3.21822
5.58579	48.1771	0.870755	69.1512	82.5896	78.39	-2.71274
5.58786	48.1771	0.997517	71.2664	88.8014	85.1467	0.925612
5.58994	48.1771	1.05865	67.4567	82.0967	77.1342	-2.16101
5.59202	48.1771	1.14016	67.1598	81.6269	76.5825	-1.50551
5.59409	48.1771	1.08533	64.0353	76.0897	70.5449	-5.26933
5.59617	48.1771	1.10285	67.1033	80.8583	75.9229	-1.99651
5.59824	48.1771	1.35166	66.6336	80.4457	75.3325	0.379213
5.60032	48.1771	1.49726	65.3999	78.895	73.4077	0.755895
5.60239	48.1771	1.63521	68.5823	82.7353	78.2461	5.42801
5.60447	48.1771	0.844229	75.3475	92.3698	90.1429	3.16068
5.60655	48.1771	1.35002	67.834	82.2542	77.4633	1.56117
5.60862	48.1771	1.35578	65.0779	78.1245	72.6393	-1.13042
5.6107	48.1771	1.62476	63.3633	75.553	69.7297	0.0972892
5.61277	48.1771	1.54244	63.3433	75.4378	69.6412	-0.808954
5.61485	48.1771	1.41357	63.4549	75.3447	69.6597	-2.1099
5.61692	48.1771	1.67721	64.1979	76.4357	70.8858	1.49015
5.619	48.1771	1.07129	69.9606	84.2018	80.164	0.491403
5.62108	48.1771	0.981366	70.1471	84.1282	80.1773	-0.38591
5.62315	48.1771	1.01762
5.62523	48.1771	1.52762	62.6755	75.6082	69.2665	-1.63768
5.6273	48.1771	1.4606	65.8714	79.0083	73.7789	0.825634
5.62938	48.1771	1.28221	68.0331	81.5006	76.9347	0.996586
5.63145	48.1771	0.991359	71.5423	86.1136	82.5619	1.12829
5.63353	48.1771	0.932474	71.0949	86.0034	82.2895	-0.0233135
5.63561	48.1771	0.857212	71.5286	87.3223	83.7298	-0.499991
5.63768	48.1771	0.882581	74.372	92.2637	89.813	2.65154
5.63976	48.1771	1.24274	73.9662	91.6308	89.0049	6.48092
5.64183	48.1771	0.938269	68.5772	83.8699	79.2406	-2.47139
5.64391	48.1771	0.993568	66.8279	80.928	75.8279	-3.5598
5.64598	48.1771	1.06774	69.4214	82.2984	78.2672	-0.0894921
5.64806	48.1771	1.11601	67.7958	81.4469	76.7692	-1.15042
5.65014	48.1771	1.10085	68.5622	81.7462	77.4004	-0.560873
5.65221	48.1771	1.02391	68.3521	81.8788	77.4079	-1.67564
5.65429	48.1771	1.13395	69.5509	83.6601	79.5018	0.813446
5.65636	48.1771	1.1357	59.0223	68.4888	62.4693	-9.69478
5.65844	48.1771	1.11381	62.099	73.0929	67.3045	-6.87288
5.66051	48.1771	1.23437	61.3389	71.955	66.0853	-6.24191
5.66259	48.1771	1.10588	67.9983	81.3237	76.7718	-1.06594
5.66466	48.1771	1.11548	62.5663	73.4826	67.8781	-6.38609
5.66674	48.1771	1.25854	61.9796	73.0754	67.2042	-5.32572
5.66882	48.1771	1.77045	62.4267	74.0017	68.084	0.699416
5.67089	48.1771	1.19262	65.4937	78.0937	72.8753	-2.56556
5.67297	48.1771	1.25628	63.1505	75.0337	69.2468	-4.18046
5.67504	48.1771	1.16158	65.321	78.4451	73.0255	-3.09625
5.67712	48.1771	1.0535	65.8344	79.3935	74.0486	-3.84398
5.67919	48.1771	1.30722	66.5797	80.2753	75.1671	-0.174167
5.68127	48.1771	1.16829	67.3164	81.0391	76.1841	-1.02333
5.68335	48.1771	1.00988	72.3403	88.3836	85.0732	2.14624
5.68542	48.1771	1.12186	73.2842	89.8747	86.9117	4.40602
5.6875	48.1771	1.03153	69.4574	84.1842	79.9285	-0.480185
5.68957	48.1771	1.26593	69.6752	84.2974	80.1268	2.45389
5.69165	48.1771	1.96176	68.5616	84.2752	79.5997	8.7981
5.69372	48.1771	1.54296	67.5486	82.8199	77.8012	3.402
5.6958	48.1771	1.38901	67.2176	81.1452	76.2174	1.38009
5.69788	48.1771	1.62826	66.1138	79.4425	74.2516	2.88524
5.69995	48.1771	1.47748	66.9278	80.7416	75.7329	2.06734
5.70203	48.1771	1.40514
5.7041	48.1771	1.51412	64.1688	76.9085	71.1884	-0.291254
5.70618	48.1771	1.96109	62.813	75.4393	69.2602	3.04281
5.70825	48.1771	2.55351	56.1787	67.8644	59.4243	2.10279
5.71033	48.1771	2.55423	55.6016	67.465	58.6403	1.53223
5.71241	48.1771	2.65396	53.8925	64.5624	55.8143	0.726786
5.71448	48.1771	2.55319	53.8045	64.5627	55.7061	-0.274387
5.71656	48.1771	2.59445	51.1309	60.8271	51.6602	-2.57212
5.71863	48.1771	2.60935	49.923	59.6458	49.8857
5.72071	48.1771	1.16155
5.72278	48.1771	1.24085	69.3856	83.9279	79.6662	1.87882
5.72486	48.1771	1.46136	64.9156	79.1382	73.2851	-0.121749
5.72694	48.1771	0.993172	75.5444	94.9551	93.2106	5.15199
5.72901	48.1771	1.1817	73.2877	90.4552	87.5354	5.10273
5.73109	48.1771	1.4233	73.814	92.0459	89.4368	8.35691
5.73316	48.1771	1.44795	65.4962	78.8788	73.455	0.311254
5.73524	48.1771	1.19571	66.4621	80.368	75.1736	-1.56168
5.73731	48.1771	1.35673	65.4642	78.3643	73.0545	-0.733442
5.73939	48.1771	1.47734	61.5195	72.3119	66.4211	-3.3425
5.74146	48.1771	1.46111	65.6914	78.8988	73.5888	0.651213
5.74354	48.1771	1.38603	64.9394	77.355	72.0022	-0.93123
5.74562	48.1771	1.49523	65.8774	79.0886	73.843	1.21115
5.74769	48.1771	0.905796	73.3917	89.5532	86.6031	1.95203
5.74977	48.1771	1.31892	69.3968	84.3998	80.0969	2.77476
5.75184	48.1771	1.39922	66.6221	80.5321	75.3948	0.898184
5.75392	48.1771	1.62562	65.1895	78.6631	73.1042	1.93272
5.75599	48.1771	1.44869	66.7997	81.4735	76.2581	1.62287
5.75807	48.1771	1.33175	68.4699	83.414	78.7833	1.9922
5.76015	48.1771	1.46324	64.7996	77.829	72.2491	-0.217202
5.76222	48.1771	1.32517	63.5041	76.7944	70.6525	-3.04757
5.7643	48.1771	1.64311	63.075	76.1416	69.9077	0.00483312
5.76637	48.1771	2.02513	62.545	75.9033	69.3591	3.41814
5.76845	48.1771	1.79886	69.458	84.5817	80.2901	8.02632
5.77052	48.1771	2.1049	60.6815	73.5417	66.4265	2.34637
5.7726	48.1771	2.10096	61.3414	74.3841	67.4667	2.96751
5.77468	48.1771	2.42711	54.1095	65.3056	56.2538	-1.13404
5.77675	48.1771	1.10483	66.5396	79.8031	74.7749	-2.53698
5.77883	48.1771	1.06982	70.564	85.282	81.4031	1.07746
5.7809	48.1771	0.841172	73.5119	90.5376	87.6855	1.28779
5.78298	48.1771	0.874018	75.5114	93.8935	91.9286	3.68704
5.78505	48.1771	0.832126	75.1712	93.8921	91.8665	2.83655
5.78713	48.1771	0.880471	72.8504	89.6989	86.5997	1.10435
5.78921	48.1771	1.23779	68.708	86.1743	81.4616	1.16628
5.79128	48.1771	1.47343	60.6992	71.5638	65.3643	-4.20571
5.79336	48.1771	1.28925	62.1818	73.3502	67.5158	-4.77499
5.79543	48.1771	1.4232	59.9332	69.767	63.8327	-5.525
5.79751	48.1771	1.27651	63.1011	75.2022	69.3183	-4.00012
5.79958	48.1771	1.59007	60.9021	74.2269	67.0088	-2.73581
5.80166	48.1771	1.4254	59.6719	72.2453	64.8359	-5.76193
5.80374	48.1771	2.21519	55.9255	69.3449	59.6669	-1.33237
5.80581	48.1771	2.53168	53.1713	69.3603	55.9477	-1.10454
5.80789	48.1771	2.46195	52.8207	67.3072	54.9525	-2.09852
5.80996	48.1771	2.55902	54.7586	71.9701	59.1212	0.732931
5.81204	48.1771	2.56117	54.59	71.6881	58.7765	0.583982
5.81411	48.1771	2.55278	54.6042	70.9512	58.5388	0.521548
5.81619	48.1771	2.52712	53.8596	69.4982	57.0181	-0.458027
5.81826	48.1771	2.56773	54.5384	70.3547	58.2458	0.592231
5.82034	48.1771	2.63262	54.5223	70.5276	58.2806	1.16453
5.82242	48.1771	2.51289	53.5877	69.3817	56.5863	-0.860777
5.82449	48.1771	2.62166	52.9063	69.421	55.5442	-0.550357
5.82657	48.1771	2.56291	52.1707	67.6923	54.0093	-1.81935
5.82864	48.1771	2.49143	50.8455	64.9598	51.4953	-3.80072
5.83072	48.1771	2.43399	52.731	66.9624	54.75	-2.44829
5.83279	48.1771	2.38641	53.7478	68.0627	56.4688	-1.87703
5.83487	48.1771	2.19592	61.5082	73.2152	66.9187	4.06349
5.83695	48.1771	1.28995	58.8756	71.8174	63.877	-8.07339
5.83902	48.1771	2.43703	51.6612	65.1789	52.8386	-3.48973
5.8411	48.1771	1.89145	60.5561	73.9317	66.5414	0.0783273
5.84317	48.1771	1.59881	56.0171	68.388	59.428	-7.52691
5.84525	48.1771	2.63057	50.7866	65.0526	51.4012	-2.58965
5.84732	48.1771	2.54936	51.3317	64.9776	52.296	-2.78218
5.8494	48.1771	2.55538	51.8405	66.0003	53.2237	-2.21834
5.85148	48.1771	2.55442	51.3965	66.1152	52.5173	-2.67105
5.85355	48.1771	0.969369	76.8213	92.9644	91.0927	6.14515
5.85563	48.1771	1.41812	61.6221	73.1669	66.9808	-3.89231
5.8577	48.1771	1.18929	65.0187	78.3455	72.7628	-3.07883
5.85978	48.1771	1.14974	68.3855	82.6921	78.1133	-0.168793
5.86185	48.1771	1.17869	68.309	82.5004	77.9114	0.0892274
5.86393	48.1771	1.24932	67.4071	81.8426	76.8945	-0.00310451
5.86601	48.1771	1.0291	67.7443	82.9251	77.9937	-2.222
5.86808	48.1771	2.27589	57.1785	68.5303	60.7349	0.505038
5.87016	48.1771	0.960328	73.9441	90.8598	88.1487	3.15985
5.87223	48.1771	1.05365	71.7094	87.4784	83.9487	2.03283
5.87431	48.1771	1.03354	67.3773	81.5372	76.6247	-2.53649
5.87638	48.1771	1.20769	67.703	81.5224	76.7835	-0.183211
5.87846	48.1771	1.09001	69.2832	84.1149	79.788	0.0333867
5.88054	48.1771	1.09771	72.1629	88.5721	85.2087	3.00308
5.88261	48.1771	0.94171	74.0446	91.856	89.2764	3.03729
5.88469	48.1771	0.857453	73.5544	90.0169	87.1383	1.52872
5.88676	48.1771	0.880871	74.0939	91.8207	89.2485	2.35269
5.88884	48.1771	0.695307	75.3487	93.6588	91.6232	1.32205
5.89091	48.1771	1.01465	75.7124	93.7151	91.7545	5.57497
5.89299	48.1771	0.959089	75.0474	92.5675	90.3039	4.24831
5.89506	48.1771	0.936262	74.7059	93.1468	90.9006	3.63311
5.89714	48.1771	0.779524	74.753	93.2566	91.0384	1.77244
5.89922	48.1771	1.31008	75.5967	93.6438	91.6506	8.87511
5.90129	48.1771	0.89098	75.3473	94.6572	92.8162	3.72858
5.90337	48.1771	1.12271	74.0151	91.9236	89.3457	5.14692
5.90544	48.1771	1.16292	72.8271	90.0223	86.9383	4.42538
5.90752	48.1771	0.970719	68.8074	83.1458	78.7091	-1.85269
5.90959	48.1771	0.971832	66.4932	78.9637	74.1077	-4.15362
5.91167	48.1771	0.996468	70.6252	85.0156	81.1811	0.271978
5.91375	48.1771	0.846461	72.7241	89.1721	86.0074	0.564511
5.91582	48.1771	0.742254	74.1194	91.714	89.1348	0.677692
5.9179	48.1771	0.719083	75.3556	94.8384	93.0386	1.62579
5.91997	48.1771	0.991669	61.0999	72.7111	66.3085	-9.31041
5.92205	48.1771	1.01085	64.7479	78.0669	72.3867	-5.43458
5.92412	48.1771	1.0864	65.675	79.5636	74.0828	-3.61713
5.9262	48.1771	1.16438	64.2377	77.3756	71.5589	-4.14713
5.92828	48.1771	1.04368	61.4361	73.5242	67.0387	-8.35813
5.93035	48.1771	0.950657	63.2964	76.0997	70.0394	-7.60368
5.93243	48.1771	1.19098
5.9345	48.1771	1.40068	62.1732	75.5073	68.8203	-3.53459
5.93658	48.1771	1.47789	60.6055	72.7989	65.9479	-4.2505
5.93865	48.1771	1.67272	59.2448	71.3912	64.0132	-3.51049
5.94073	48.1771	1.79126	59.2454	71.865	64.2501	-2.26511
5.94281	48.1771	1.8009	58.548	71.2958	63.3064	-2.86246
5.94488	48.1771	1.68254	60.3672	73.0817	65.8995	-2.28398
5.94696	48.1771	1.71658	59.1234	71.616	64.0118	-3.16843
5.94903	48.1771	1.7077	59.6564	71.8776	64.6321	-2.72902
5.95111	48.1771	1.31336	58.0078	69.6076	62.0109	-8.67683
5.95318	48.1771	1.97742	55.2762	65.8349	57.7678	-4.32935
5.95526	48.1771	2.139	54.697	66.8262	57.3737	-3.30293
5.95734	48.1771	1.91922	55.8022	67.3688	58.8365	-4.39245
5.95941	48.1771	1.5276	54.7727	64.0645	56.7228	-9.54066
5.96149	48.1771	2.43582	54.5005	68.868	57.7228	-0.661768
5.96356	48.1771	1.45826	62.8886	74.8965	68.972	-2.18287
5.96564	48.1771	1.29645	62.9014	76.0403	69.7141	-3.97414
5.96771	48.1771	1.25624	65.6047	78.8348	73.4884	-1.72677
5.96979	48.1771	1.42096	61.7645	74.0985	67.6355	-3.71844
5.97186	48.1771	1.47062	62.9791	75.5848	69.475	-1.95661
5.97394	48.1771	1.92647	58.0265	68.9603	61.7536	-2.09442
5.97602	48.1771	1.9695	49.2262	56.0386	48.9776
5.97809	48.1771	0.854367
5.98017	48.1771	0.911797
5.98224	48.1771	1.06625	57.2438	66.7431	60.1262	-12.2847
5.98432	48.1771	1.15721	41.945	46.0937	40.1766
5.98639	48.1771	1.30086	61.6972	72.8345	66.8505	-5.12844
5.98847	48.1771	1.33622	62.9464	75.1093	69.1478	-3.48114
5.99055	48.1771	1.10914	67.8701	81.0029	76.445	-1.15622
6.003	48.1771	0.716838	70.6682	84.4903	80.7192	-3.08957
6.00466	60.241	1.04485	72.8039	88.3766	85.2138	3.0236
6.00632	60.241	1.08962	69.4661	83.7392	79.5341	0.211705
6.00798	60.241	1.19786	71.106	86.4013	82.6745	3.10694
6.00964	60.241	0.798098	74.2028	90.8048	88.1545	1.451
6.0113	60.241	0.900039	71.3183	86.6672	83.0109	-0.190861
6.01296	60.241	1.12084	64.7255	77.4755	71.9501	-4.16444
6.01462	60.241	1.14273	66.4633	80.2118	75.0509	-2.17219
6.01628	60.241	1.85047	58.5496	69.8903	62.6573	-2.34845
6.01794	60.241	1.8209	58.5939	69.9544	62.7279	-2.60932
6.0196	60.241	2.00052	60.2671	72.045	65.2548	0.893779
6.02126	60.241	2.13466	59.3057	71.0821	63.9171	1.26325
6.02292	60.241	2.21658	58.5426	70.6157	62.9814	1.29821
6.02458	60.241	2.01713	60.4643	72.4728	65.6509	1.25746
6.02624	60.241	1.02494	68.0557	81.5559	76.9918	-1.95986
6.0279	60.241	0.762153	71.5626	87.2634	83.6836	-1.63245
6.02956	60.241	1.02317	66.4786	80.3875	75.1985	-3.55788
6.03122	60.241	1.41335	63.2753	76.5047	70.2939	-2.29191
6.03288	60.241	1.35361	58.8542	70.2332	63.0986	-7.37837
6.03454	60.241	0.833466	70.5774	86.3239	82.3963	-1.74089
6.0362	60.241
6.03786	60.241	0.82007	71.3378	86.9906	83.3337	-1.14434
6.03952	60.241	0.894261	71.1749	87.1024	83.3841	-0.404101
6.04118	60.241	1.07126	69.5218	84.8465	80.5617	0.0521399
6.04284	60.241	1.02955	67.6814	81.9618	77.1381	-2.27968
6.0445	60.241	1.10531	69.7326	84.732	80.5479	0.661601
6.04616	60.241	1.02123	71.9033	87.5701	84.1073	1.84385
6.04782	60.241	1.1514	60.1581	70.8995	64.5741	-8.37701
6.04948	60.241	1.12594	73.9156	93.5365	91.2008	5.08492
6.05114	60.241	1.09698	71.614	88.3151	84.7613	2.44571
6.0528	60.241	1.22186	70.1153	85.2484	81.1882	2.39147
6.05446	60.241	0.913496	68.2036	81.3963	76.9348	-3.14309
6.05612	60.241	1.24856	64.5833	76.345	71.0778	-2.83556
6.05778	60.241	1.3948	66.2187	79.1117	74.0614	0.445637
6.05944	60.241	1.06562	66.0799	78.8682	73.7972	-3.45601
6.0611	60.241	1.26021	61.0285	71.8557	65.7856	-6.25779
6.06276	60.241	1.23464	55.5684	64.0534	57.5754	-12.0093
6.06442	60.241	1.11093	64.8598	76.9629	71.6778	-4.14568
6.06608	60.241	1.14026	68.78	82.3743	78.0324	0.115747
6.06774	60.241	1.31969	63.7079	75.8948	70.1929	-2.90542
6.0694	60.241	1.25835	71.7881	87.4653	83.9631	4.48066
6.07106	60.241	1.10534	69.3408	83.4257	79.2008	0.270127
6.07272	60.241	1.07813	62.594	74.3544	68.4213	-6.79503
6.07438	60.241	1.15619	60.1117	70.3739	64.275	-8.36793
6.07604	60.241	1.12392	63.3926	75.1778	69.5093	-5.46152
6.0777	60.241	1.20723	64.2205	76.8371	71.174	-3.67093
6.07936	60.241	1.09958	65.2773	78.3643	72.939	-3.86066
6.08102	60.241	1.01891	69.364	83.5078	79.2836	-0.722955
6.08268	60.241	1.13111	64.7517	76.6761	71.4113	-4.01881
6.08434	60.241	1.20436	60.7909	71.3317	65.318	-7.13349
6.086	60.241	1.21772	60.2731	70.7955	64.6186	-7.49815
6.08766	60.241	0.964165	66.0342	79.2641	74.0688	-4.70416
6.08932	60.241	1.20648	59.2221	68.9815	62.8613	-8.67806
6.09098	60.241	1.1667	63.0862	74.1404	68.6465	-5.27196
6.09264	60.241	1.13037	70.1807	84.9599	80.9477	1.40156
6.0943	60.241	0.958038	68.4613	82.7485	78.1988	-2.35035
6.09596	60.241	1.05142	65.6889	79.0887	73.7299	-4.01403
6.09762	60.241	1.02755	56.6398	65.5035	59.1035	-13.3449
6.09928	60.241	1.01628	65.9914	79.6165	74.313	-4.12666
6.10094	60.241	1.06108	62.7417	74.5703	68.6623	-6.84753
6.1026	60.241	1.37938	60.0957	70.743	64.4434	-5.84906
6.10426	60.241	0.976854	68.6658	82.4318	78.0266	-1.92109
6.10592	60.241	0.848805	71.1701	86.1819	82.4882	-0.960908
6.10758	60.241	1.02808	68.7033	82.6987	78.2726	-1.27505
6.10924	60.241	0.969043	68.3908	82.1425	77.648	-2.28932
6.1109	60.241	1.03683	69.964	84.983	80.8782	0.0889674
6.11256	60.241	0.733278	68.7169	83.1025	78.6285	-4.83629
6.11422	60.241	0.979821	68.6216	82.8898	78.3983	-1.92982
6.11588	60.241	1.069	65.6408	79.0786	73.6932	-3.8553
6.11754	60.241	1.11069	56.3825	65.5752	58.8691	-12.6257
6.1192	60.241	0.925106	65.6534	78.7891	73.4838	-5.55348
6.12086	60.241	0.814048	65.5853	78.0324	72.8867	-6.97064
6.12252	60.241	0.928191	65.995	80.2117	74.7784	-5.17476
6.12418	60.241	1.14073	61.1537	73.5065	66.8002	-7.50514
6.12584	60.241	1.68111	62.9004	75.6138	69.4363	0.234052
6.1275	60.241	1.12642	66.0471	78.9372	73.8297	-2.77783
6.12916	60.241	1.18761	64.518	77.0163	71.4942	-3.59896
6.13082	60.241	0.880871	61.7253	72.6446	66.7654	-10.0159
6.13248	60.241	0.90827	64.3162	76.0155	70.6826	-7.09352
6.13414	60.241	1.17415	60.5223	71.0317	64.9445	-7.74977
6.1358	60.241	1.22904	65.4352	78.0152	72.7826	-2.20644
6.13746	60.241	1.30027	65.4032	78.3343	72.9951	-1.42907
6.13912	60.241	0.727866	70.1659	84.7555	80.7536	-3.45456
6.14078	60.241	0.722552	65.1557	77.4807	72.2271	-8.53089
6.14244	60.241	0.699751	70.574	84.9906	81.1374	-3.39707
6.1441	60.241	0.931865	66.9367	79.8147	75.0061	-4.1889
6.14576	60.241	0.739256	70.368	85.304	81.3442	-3.11089
6.14742	60.241	0.857815	69.2273	83.875	79.5475	-2.79399
6.14908	60.241	0.837841	70.4563	85.8418	81.8864	-1.80853
6.15074	60.241	0.977724	69.6635	84.5801	80.3787	-0.91294
6.1524	60.241	1.10537	68.0412	81.7857	77.175	-1.02904
6.15406	60.241	0.775173	69.0501	83.2647	78.9266	-3.98415
6.15572	60.241	0.870755	70.5681	85.4195	81.5331	-1.2958
6.15738	60.241	0.847202	68.0572	81.4742	76.9251	-4.09341
6.15904	60.241	0.994405	68.0803	81.6053	77.045	-2.29744
6.1607	60.241	1.24457	67.3168	80.4892	75.7426	-0.147503
6.16236	60.241	1.18549	66.4651	79.5238	74.517	-1.67636
6.16402	60.241	0.996293	51.8052	58.8819	52.3765	-18.5501
6.16568	60.241	0.956745	57.7773	66.7667	60.6433	-13.0499
6.16734	60.241	1.02584	59.7792	70.3959	64.0029	-10.2257
6.169	60.241	1.00199	61.3422	72.0441	66.1361	-8.94543
6.17066	60.241	1.03918	60.0046	69.5954	63.8111	-9.84275
6.17232	60.241	1.21648
6.17398	60.241	0.922102	63.0775	75.5034	69.4939	-8.16556
6.17564	60.241	1.30151
6.1773	60.241	0.90309	69.9874	84.5045	80.4492	-1.48485
6.17896	60.241	0.762078	69.5827	83.7244	79.5728	-3.61337
6.18062	60.241	1.0141	60.7622	71.7099	65.4926	-9.3817
6.18228	60.241	1.24778	61.4028	72.348	66.3498	-6.02502
6.18394	60.241	1.61438	57.8262	69.0422	61.5927	-5.55083
6.1856	60.241	1.40705	58.7076	71.3658	63.4947	-6.92951
6.18726	60.241	2.06905	56.2981	66.6789	59.1458	-2.39146
6.18892	60.241	2.36447	56.1193	68.7537	59.6751	0.287837
6.19058	60.241	2.56275	52.9905	66.5833	55.054	-1.00107
6.19224	60.241	2.55578	52.7712	65.9464	54.6154	-1.28396
6.1939	60.241	2.51672	53.6045	66.616	55.9152	-0.808696
6.19556	60.241	2.64678	53.3483	67.013	55.6543	0.118135
6.19722	60.241	2.54495	53.2327	66.789	55.4417	-0.921558
6.19888	60.241	2.58971	52.6767	66.2924	54.5428	-1.06941
6.20054	60.241	2.59	52.1782	65.065	53.607	-1.56528
6.2022	60.241	2.54294	52.32	65.7243	53.9183	-1.85261
6.20386	60.241	2.59383	51.6464	64.3467	52.7201	-2.06234
6.20552	60.241	2.61231	51.3462	64.1323	52.239	-2.19498
6.20718	60.241	2.60447	50.504	63.6055	50.857	-3.10828
6.20884	60.241	0.817036	76.3658	94.396	92.6639	3.84652
6.2105	60.241	1.223	75.7284	93.1382	91.0898	8.01763
6.21216	60.241	0.739177	76.8722	94.3887	92.7328	3.39239
6.21382	60.241	1.19899	76.3308	93.3513	91.4433	8.34465
6.21548	60.241	0.786396	76.7528	94.5609	92.9177	3.85703
6.21714	60.241	0.812847	76.3234	93.7432	91.8928	3.75268
6.2188	60.241	0.815511	76.4099	92.8272	90.8643	3.8719
6.22046	60.241	0.836894	75.4589	92.1539	89.9248	3.18252
6.22212	60.241	1.05881	76.4795	93.4837	91.6206	6.86351
6.22378	60.241	0.911371	75.9466	92.5673	90.485	4.57426
6.22544	60.241	0.704494	76.5645	92.9296	91.0075	2.65266
6.2271	60.241	0.73512	77.0773	94.2604	92.6137	3.54704
6.22876	60.241	0.895533	73.8345	90.0288	87.2274	2.27088
6.23042	60.241	0.731428	72.1469	87.3273	83.9502	-1.42924
6.23208	60.241	0.844974	72.1204	87.0536	83.6729	-0.0573168
6.23374	60.241	0.86362	75.9832	92.2903	90.1836	4.0326
6.2354	60.241	1.39744	74.2967	89.3144	86.6074	8.55287
6.23706	60.241	0.935608	73.3342	88.9887	86.0002	2.25362
6.23872	60.241	0.847449	74.8639	91.4732	89.0421	2.71633
6.24038	60.241	0.884115	73.3555	88.5617	85.5705	1.65363
6.24204	60.241	1.35729	64.0305	75.0891	69.8886	-2.16094
6.2437	60.241	1.2418	67.834	80.5182	76.0375	0.337991
6.24536	60.241	0.851075	74.4518	89.6942	87.0412	2.34845
6.24702	60.241	0.964495	76.3713	93.157	91.2293	5.63687
6.24868	60.241	0.993304	68.2526	81.1934	76.7934	-2.13825
6.25034	60.241	1.21638	63.0958	74.5968	68.9342	-4.69075
6.252	60.241	1.14095	64.7382	77.0287	71.6456	-3.91808
6.25366	60.241
6.25532	60.241	1.34163	70.9244	85.8579	82.086	4.55759
6.25698	60.241	1.1088	67.8264	81.5888	76.9021	-1.20386
6.25864	60.241	0.995986	67.9545	81.5614	76.9449	-2.4045
6.2603	60.241	0.91719	76.4276	91.9683	89.9183	5.12539
6.26196	60.241	0.731991	70.7477	85.2727	81.4679	-2.82144
6.26362	60.241	0.781468	73.5215	88.9804	86.0465	0.564953
6.26528	60.241	0.988202	72.0169	86.9976	83.5825	1.56528
6.26694	60.241	0.704751	75.7828	91.4875	89.2623	1.87415
6.2686	60.241	0.676785	76.1115	91.6559	89.5144	1.85273
6.27026	60.241	0.783761	74.0594	88.636	85.8512	1.13108
6.27192	60.241	1.14545	61.0869	72.2954	66.0697	-7.51721
6.27358	60.241	1.88215	57.0892	68.6438	60.687	-3.48374
6.27524	60.241	0.909503	67.1972	79.2605	74.7226	-4.19773
6.2769	60.241	0.900367	61.0091	69.8911	64.7608	-10.4961
6.27856	60.241	1.02477	62.5857	74.7622	68.6659	-7.43184
6.28022	60.241	1.20483	57.6592	68.3082	61.1292	-10.2599
6.28188	60.241	1.69598	59.0817	70.4019	63.3867	-3.42738
6.28354	60.241	1.83331	59.3865	71.291	64.0932	-1.6885
6.2852	60.241	1.29341	58.4475	70.7351	62.9449	-8.46241
6.28686	60.241	0.897517	58.3319	71.4493	63.1663	-13.2078
6.28852	60.241	0.804548	63.3583	75.7792	69.873	-9.31427
6.29018	60.241	1.00117	60.9894	73.1645	66.4713	-9.30793
6.29184	60.241	1.5853	59.7494	71.7998	64.6755	-3.93983
6.2935	60.241	2.0814	58.6337	72.3979	63.9306	0.0664854
6.29516	60.241	0.949488	59.0623	72.9294	64.6234	-11.8518
6.29682	60.241	1.26682	68.7367	81.77	77.5046	1.52546
6.29848	60.241	0.901731	74.6471	89.3757	86.7641	3.15833
6.30014	60.241	1.17534	73.5409	87.4854	84.5572	5.28249
6.3018	60.241	0.898506	72.678	86.1193	82.9696	1.15028
6.30346	60.241	0.86362	75.3027	90.3809	87.9726	3.35201
6.30512	60.241	0.89003	72.0184	84.7689	81.4922	0.388153
6.30678	60.241	1.13181	60.2621	70.5707	64.4976	-8.5002
6.30844	60.241	1.38929	58.621	68.3561	62.0545	-7.21339
6.3101	60.241	1.34213	65.5311	77.8968	72.7558	-0.830113
6.31176	60.241	1.08048	64.8685	76.9636	71.6839	-4.49292
6.31342	60.241	0.910464	67.7162	81.1805	76.5099	-3.66705
6.31508	60.241	1.0703	72.3224	87.3787	84.0604	2.84144
6.31674	60.241	1.04379	72.0027	85.9534	82.5778	2.20992
6.3184	60.241	0.826334	71.6587	85.6096	82.1307	-0.746786
6.32006	60.241	1.37521	60.1591	70.655	64.4532	-5.83212
6.32172	60.241	1.29959	59.6436	70.0371	63.7139	-7.19637
6.32338	60.241	1.13707	62.1057	73.5618	67.5819	-6.59555
6.32504	60.241	1.21264	66.8588	79.761	74.9214	-0.970603
6.3267	60.241	0.935356	67.0153	79.4305	74.7533	-4.06836
6.32836	60.241	0.6861	69.8587	82.8329	78.9174	-4.28327
6.33002	60.241	0.972157	59.715	69.9368	63.7279	-10.9279
6.33168	60.241	1.32426	58.6444	68.6743	62.2114	-7.91743
6.33334	60.241	1.38596	60.6459	71.2185	65.1415	-5.22551
6.335	60.241	1.07218	62.98	74.4227	68.7439	-6.47882
6.33666	60.241	0.958277	64.8378	76.8731	71.6018	-5.97098
6.33832	60.241	1.02036	65.1416	76.7691	71.7215	-4.92818
6.33998	60.241	1.09611	64.2755	75.8733	70.5615	-4.90294
6.34164	60.241	1.25566	60.1993	70.7792	64.5487	-7.13882
6.3433	60.241	1.60067	56.1115	66.0769	58.7511	-7.41259
6.34496	60.241	1.15509	60.9204	71.4211	65.4691	-7.57196
6.34662	60.241	1.11099	61.7713	72.0875	66.4913	-7.23339
6.34828	60.241	1.03499	63.0685	74.1868	68.6623	-6.82829
6.34994	60.241	1.22292	63.7004	74.8915	69.5403	-4.0112
6.3516	60.241	1.22639	62.4758	73.6699	67.9224	-5.19611
6.35326	60.241	1.34899
6.35492	60.241	1.46956
6.35658	60.241	1.08902
6.35824	60.241	1.32354	59.9207	70.5468	64.1978	-6.64928
6.3599	60.241	1.1364	60.7544	71.6404	65.4497	-7.95458
6.36156	60.241	1.34528	60.5939	71.1497	65.0636	-5.73201
6.36322	60.241	1.23325	62.6635	74.411	68.507	-4.93012
6.36488	60.241	1.34657	63.573	76.1821	70.2893	-2.73838
6.36654	60.241	1.44237	64.0976	76.9118	71.1428	-1.14881
6.3682	60.241	1.20618	71.1493	87.0358	83.309	3.24579
6.36986	60.241	0.866465	73.7099	89.0967	86.2202	1.79379
6.37152	60.241	0.685652	75.3555	91.7539	89.4603	1.20792
6.37318	60.241	1.46096	65.3639	77.6724	72.4925	0.322048
6.37484	60.241	1.20164	66.4722	78.6925	73.893	-1.48336
6.3765	60.241	1.30542	65.6531	77.9936	72.8997	-1.12112
6.37816	60.241	1.27024	64.7895	76.5985	71.3825	-2.38289
6.37982	60.241	1.23101	65.9013	78.1545	73.165	-1.71786
6.38148	60.241	1.35951	65.1492	76.796	71.7447	-1.01735
6.38314	60.241	1.03806	65.1788	77.643	72.3568	-4.6816
6.3848	60.241	0.954001	71.1722	85.3138	81.6721	0.312236

## Sheet: D(TH)
Diversity of the thermo-humidiphilous mollusk group of the Dongwan section, western CLP (Li et al., 2014).The chronology of the Dongwan sequence has been modified to GPTS2012.
Age (Ma)	D(TH)
3.52578	0
3.53688	0.468996
3.54955	0.918296
3.56096	1.68548
3.57407	1.45915
3.58524	0.918296
3.59618	0.439497
3.6084	0
3.61862	0
3.63069	0.357429
3.64386	0.621904
3.65518	0.639556
3.6644	1
3.67603	0
3.68357	1.25163
3.69095	0
3.69826	1
3.70954	0
3.7205	0
3.72999	0
3.73895	0
3.74964	0
3.7614	0
3.77227	0
3.78219	0
3.79328	0.918296
3.80485	0
3.81623	0
3.82625	0
3.83702	0
3.84823	0
3.85822	0
3.86945	0.811278
3.88158	0
3.89134	0
3.90354	0
3.91611	0
3.92244	0
3.93423	0
3.9477	0
3.96185	0.863121
3.97604	0
3.98948	0
4.00344	0
4.01673	0
4.02289	1.7246
4.0351	0.77065
4.04802	0.51857
4.05745	1.8052
4.07051	1.7216
4.07637	1.28429
4.09067	1.64082
4.10433	0.169826
4.11614	1.229
4.1299	1.37018
4.1426	1.51463
4.15517	1.14883
4.16407	1.56294
4.17459	2.37307
4.18347	1.22858
4.18841	0
4.19571	1.28678
4.20233	1.66918
4.20869	2.6416
4.21615	1.87693
4.22445	1.36401
4.2328	1.85654
4.24121	1.61058
4.24891	0.985228
4.25601	2.09227
4.26353	1.23096
4.27078	1.48853
4.27836	1.57379
4.28615	0.958712
4.29517	1
4.30511	0.863121
4.31453	2.05881
4.32414	2.07416
4.33355	1.42177
4.34565	0.863121
4.35643	1.29879
4.36389	0
4.37329	0
4.38649	0
4.39083	0
4.40142	0
4.40822	0
4.41749	0
4.42695	0
4.43641	0
4.44565	0.918296
4.45252	0
4.46109	0
4.47052	0
4.48	0
4.49505	0.918296
4.5074	0
4.51616	0
4.53187	0
4.54804	0
4.55773	0
4.57428	0
4.58625	0
4.5999	1
4.61417	1
4.6341	1.25163
4.64523	1.58496
4.65719	0
4.66939	0
4.68162	0
4.69262	0
4.70503	0
4.71605	0
4.72861	0
4.74112	0
4.75194	0
4.7636	1
4.77559	0
4.78503	0
4.79503	0
4.81125	1.37095
4.83027	1
4.85141	0
4.8788	0
4.89124	0
4.89484	0
4.89863	0.811278
4.90211	0.811278
4.9053	0.918296
4.90928	1
4.91324	1.35164
4.91761	0.918296
4.92211	0
4.92675	2.21535
4.93133	1.23664
4.93631	1.40234
4.9404	1.49064
4.94522	1.40564
4.95031	1.52193
4.95525	1.95236
4.96063	1.90113
4.96742	1.25163
4.97459	0
4.98297	0
4.99514	0.721928
5.00593	0.33729
5.02033	1.54879
5.03498	1.10331
5.0489	1.45047
5.06247	1.39546
5.07723	1.53948
5.09138	0
5.10576	0
5.11931	0
5.12987	0
5.14064	0
5.15406	0
5.16667	0
5.17791	0
5.18855	0
5.20217	0
5.21581	1
5.235	0
5.2452	0
5.2554	0
5.26559	0
5.27579	0.918296
5.28599	0.721928
5.29619	1.48336
5.30639	1
5.31658	0
5.32678	0.811278
5.33698	0.811278
5.34718	0
5.35738	0
5.37777	0.811278
5.39817	0
5.40837	0
5.42876	1
5.44916	0
5.45936	0.946373
5.46956	0
5.47975	0
5.50015	0
5.51035	0
5.53074	0
5.54094	0
5.55114	0
5.56134	0
5.58173	0
5.60213	0
5.61233	0
5.62253	0
5.64292	0
5.66332	0
5.68372	0
5.69901	0
5.71431	0
5.72451	0
5.73471	0
5.7449	0
5.7551	1.28067
5.7653	0
5.7755	0
5.7908	0
5.80609	0
5.82649	0
5.85708	0
5.86728	0
5.87748	0
5.88768	0
5.90807	0
5.92847	0
5.94887	0
5.96926	0
5.98966	1
5.99986	0
6.01005	0.721928
6.02025	0.371232
6.033	0
6.04045	1.36096
6.0479	1.58496
6.05535	0.554778
6.06131	0
6.06727	0
6.07471	0
6.08961	1
6.10153	0
6.10749	0
6.11494	0
6.1209	0
6.12686	0
6.13282	0
6.13878	0
6.14473	0
6.15069	0.522978
6.15665	0
6.16261	0.918296
6.16857	0
6.17453	0
6.18049	0
6.18645	0
6.19241	0
6.19837	0.146094
6.20433	0.892456
6.21624	1
6.22816	0
6.24008	0
6.24604	0
6.252	0
6.28705	0
6.31333	0
6.33962	0
6.37467	0
6.40095	0
6.436	0
